# Supplementary material
Source: PubMed Central journal article supplement (PMC3497699)
Supplement: JVI.01545-12_zjv999096866so1.pdf [file JVI.01545-12_zjv999096866so1.pdf]

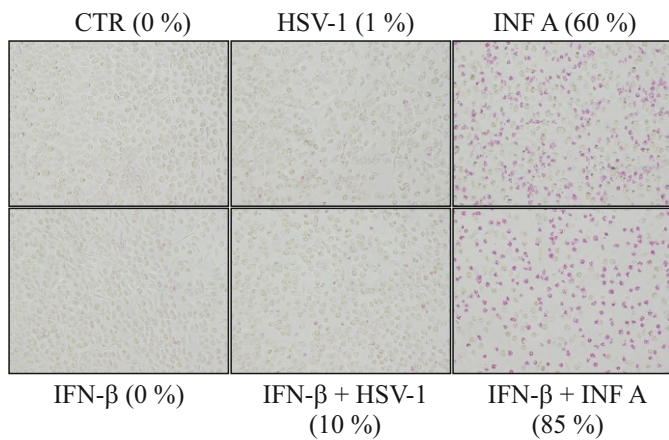

**Supplementary figure 1. Proteins in the HSV-1 infected macrophage secretome do not originate from apoptotic cells.** Macrophages were left untreated (CTR), primed with 200 IU/ml of IFN- $\beta$  for 6 h. After 4 h IFN- $\beta$  priming cells were infected either with HSV-1 (MOI 1), or Human pathogenic H3N2 Influenza A virus strain Udom/72 (INF A; 2.56 hemagglutination U/ml) for 18 h. After 2 h of infection cell culture media was changed. Apoptotic cells from control CTR, IFN- $\beta$ , HSV-1, IFN- $\beta$  + HSV-1, INF A, and IFN- $\beta$  + INF A infected macrophages were stained using APOPercentage Apoptosis Assay 18 hpi. Apoptotic cells are stained purple. Percentage of apoptotic cells are indicated in brackets. APOPercentage Apoptosis Assay was done according to the manufacturer's instructions (Biocolor Life Science Assays). Images were captured with a DP70 digital microscope camera (Olympus), connected to an IX71 light microscope (Olympus), and using DP Controller (version 2.2.1.227) and DP Manager (2.2.1.195) (Olympus) software. The stained and unstained cells were manually counted, and the percentage of apoptotic cells was calculated.
