# Supplementary material
Source: PubMed Central journal article supplement (PMC3497699)
Supplement: JVI.01545-12_zjv999096866so2.pdf [file JVI.01545-12_zjv999096866so2.pdf]

Supplementary TABLE 1. Proteins identified and quantified in the macrophage secretome

| Protein name                                       | Human proteins        |                 |      |      |           |      |           |      |              |         |             |         |             |         |             |         |                     |         |             |         |
|----------------------------------------------------|-----------------------|-----------------|------|------|-----------|------|-----------|------|--------------|---------|-------------|---------|-------------|---------|-------------|---------|---------------------|---------|-------------|---------|
|                                                    | SwissProt<br>Acc. No. | Genetrail<br>ID | N    |      | % Seq Cov |      | Pept(95%) |      | IFN- $\beta$ |         |             |         | HSV-1       |         |             |         | IFN- $\beta$ +HSV-1 |         |             |         |
|                                                    |                       |                 | Exp1 | Exp2 | Exp1      | Exp2 | Exp1      | Exp2 | Exp1         | Exp2    | Exp1        | Exp2    | Exp1        | Exp2    | Exp1        | Exp2    | Exp1                | Exp2    | Exp1        | Exp2    |
|                                                    |                       |                 |      |      |           |      |           |      | Fold change  | P-value | Fold change | P-value | Fold change | P-value | Fold change | P-value | Fold change         | P-value | Fold change | P-value |
| 14-3-3 protein beta/alpha                          | P31946                | YWHAB           | 232  | 310  | 61,4      | 47,2 | 18        | 9    | 1,48         | 1,48    | 0,1081      | 0,2343  | 2,07        |         | 0,0246      | 3,91    | 3,38                | 0,0084  | 0,025       |         |
| 14-3-3 protein epsilon                             | P62258                | YWHAE           | 142  | 227  | 51        | 38,8 | 14        | 8    |              | 1,58    |             | 0,0398  |             |         | 2,74        | 2,58    | 0,0063              | 0,0018  |             |         |
| 14-3-3 protein eta                                 | Q04917                | YWHAH           | 223  | 232  | 47,6      | 39   | 11        | 7    | 1,36         |         | 0,0022      |         | 2,04        |         | 0,0012      | 3,75    | 5,15                | 0,0001  | 0,0081      |         |
| 14-3-3 protein gamma                               | P61981                | YWHAG           | 164  | 119  | 58,7      | 53   | 13        | 11   | 1,32         | 1,98    | 0,0213      | 0,0108  | 2,05        |         | 0,0067      | 3,26    | 3,17                | 0,0001  | 0,004       |         |
| 14-3-3 protein theta                               | P27348                | YWHAQ           | 340  | 454  | 50,2      | 44,1 | 11        | 5    | 1,76         | 2,46    | 0,0429      | 0,0307  | 3,19        |         | 0,0193      | 6,28    | 4,61                | 0,0138  | 0,0015      |         |
| 14-3-3 protein zeta/delta                          | P63104                | YWHAZ           | 58   | 54   | 60,8      | 55,1 | 19        | 11   | 1,38         | 1,77    | 0,0112      | 0       | 2,00        |         | 0,0001      | 3,62    | 3,09                | 0       | 0           |         |
| 3-ketoacyl-CoA thiolase, mitochondrial             | P42765                | ACAA2           | 291  | 374  | 18,6      | 10,8 | 4         | 2    | 1,32         |         | 0,0065      |         | 1,76        |         | 0,0046      | 2,90    |                     | 0       |             |         |
| 40S ribosomal protein S25                          | P62851                | RPS25           | 480  | 429  | 29,6      | 22,4 | 2         | 1    |              |         |             |         |             |         |             | 9,34    |                     | 0,0469  |             |         |
| 40S ribosomal protein SA                           | P08865                | RPSA            | 628  | 340  | 23,7      | 24,4 | 1         | 2    |              |         |             |         |             |         |             |         | 11,72               |         | 0,0449      |         |
| 45 kDa calcium-binding protein precursor           | Q9BRK5                | SDF4            | 166  | 247  | 35,4      | 28,5 | 9         | 3    |              |         |             |         | 0,50        |         | 0,015       | 1,41    | 1,42                | 0,0428  | 0,0434      |         |
| 4F2 cell-surface antigen heavy chain               | P08195                | SLC3A2          | 154  | 279  | 26,1      | 11,7 | 7         | 3    | 1,25         |         | 0,0048      |         | 1,41        |         | 0,0005      | 2,15    |                     | 0,0001  |             |         |
| 4-trimethylaminobutyraldehyde dehydrogenase        | P49189                | ALDH9A1         | 582  | 360  | 19,4      | 19,2 | 2         | 3    | 1,64         | 1,77    | 0,0039      |         |             |         |             | 3,88    | 3,91                | 0,0539  |             |         |
| 60 kDa heat shock protein, mitochondrial precursor | P10809                | HSPD1           | 394  |      | 14,3      |      | 2         |      | 1,33         |         | 0,0049      |         | 1,64        |         | 0,004       | 2,64    |                     | 0,0007  |             |         |
| 60S acidic ribosomal protein P0 (Fragment)         | Q53HK9                | RPLP0           | 392  | 297  | 23,7      | 21,8 | 2         | 2    | 1,46         | 1,66    | 0,0076      | 0,0334  | 2,33        |         | 0,0025      | 4,33    | 2,94                | 0,002   | 0,0023      |         |
| 60S ribosomal protein L10a                         | P62906                | RPL10A          | 411  | 244  | 34        | 27,7 | 2         | 3    | 1,47         | 1,48    | 0,0108      | 0,189   | 2,15        |         | 0,0009      | 3,16    | 2,14                | 0,0012  | 0,0182      |         |
| 60S ribosomal protein L8                           | P62917                | RPL8            | 342  | 619  | 29,2      | 13,6 | 2         | 1    |              |         |             |         | 2,18        |         | 0,0085      | 6,16    | 6,08                | 0,0161  |             |         |
| 6-phosphogluconate dehydrogenase, decarboxylating  | P52209                | PGD             | 68   | 52   | 35,2      | 31,3 | 14        | 10   | 1,39         | 1,51    | 0           | 0,0002  | 2,37        |         | 0           | 4,37    | 3,26                | 0       | 0           |         |
| 6-phosphogluconolactonase                          | O95336                | PGLS            | 229  | 549  | 46,9      | 15,1 | 5         | 1    |              |         |             |         | 2,02        |         | 0,0044      | 3,60    |                     | 0,0016  |             |         |
| 70 kDa SHP-1L protein                              | Q9UK67                | PTPN6           | 124  | 115  | 29,3      | 20,8 | 7         | 7    | 1,46         |         | 0,0367      |         | 1,95        |         | 0,0051      | 3,92    | 4,01                | 0,0001  | 0           |         |
| 78 kDa glucose-regulated protein precursor (GRP78) | P11021                | HSPA5           | 29   | 84   | 58        | 32   | 25        | 11   | 1,18         | 1,56    | 0,0006      | 0,0013  | 1,56        |         | 0           | 2,15    | 2,53                | 0       | 0,0004      |         |
| Acetyl-CoA acetyltransferase, cytosolic            | Q9BWD1                | ACAT2           | 544  | 294  | 13,9      | 13,6 | 1         | 2    | 1,73         | 1,90    | 0,0679      | 0,0197  | 2,81        |         | 0,0167      | 4,91    | 4,62                | 0,0017  | 0,0002      |         |
| ACLY variant protein (Fragment)                    | Q4LE36                | ACLY            | 107  | 271  | 19,5      | 12,3 | 9         | 2    | 1,31         | 1,84    | 0,1636      | 0,0005  | 2,05        |         | 0,0016      | 3,40    | 3,64                | 0,0003  | 0,0002      |         |
| Aconitase 1, soluble                               | Q5VZA7                | ACO1            | 858  | 336  | 15,4      | 9,7  | 0         | 2    | 1,69         | 1,83    | 0,1193      | 0,0197  |             |         |             |         | 4,10                |         | 0,047       |         |
| Actin related protein 2/3 complex                  | Q2LE71                | ARPC3           | 422  | 283  | 32,6      | 34,8 | 2         | 3    | 1,38         | 1,79    | 0,0058      | 0,0221  | 2,01        |         | 0,0024      | 3,67    | 3,31                | 0,0051  | 0,0056      |         |
| Actin, alpha 1, skeletal muscle                    | Q5T8M9                | ACTA1           | 780  | 598  | 36,3      | 31   | 17        | 14   | 1,76         | 1,75    |             |         |             |         |             |         |                     |         |             |         |
| Actin, beta (Fragment)                             | Q96HG5                | ACTB            | 43   | 31   | 56,8      | 57,6 | 26        | 21   | 1,51         | 1,93    | 0,0096      | 0,0012  | 2,59        |         | 0,0017      | 4,72    | 5,25                | 0,001   | 0,0002      |         |
| Actinin alpha 1 isoform b                          | Q1HE25                | ACTN1           | 16   | 18   | 43,3      | 32,2 | 37        | 22   | 1,26         | 1,53    | 0,0002      | 0,0004  | 1,68        |         | 0           | 2,64    | 2,73                | 0       | 0           |         |
| Actin-related protein 2                            | P61160                | ACTR2           | 144  | 134  | 36        | 30   | 10        | 5    | 1,28         | 1,83    | 0,0073      | 0       | 1,89        |         | 0           | 3,24    | 4,15                | 0       | 0           |         |

|                                                          |        |          |     |     |      |      |    |    |      |      |        |        |      |        |        |        |        |        |        |        |
|----------------------------------------------------------|--------|----------|-----|-----|------|------|----|----|------|------|--------|--------|------|--------|--------|--------|--------|--------|--------|--------|
| Actin-related protein 2/3 complex subunit 1B             | O15143 | ARPC1B   | 187 | 142 | 29,3 | 31,5 | 5  | 6  | 1,44 | 1,54 | 0,0001 | 0,1725 | 1,97 | 0,0001 | 3,64   | 3,19   | 0      | 0,0041 |        |        |
| Actin-related protein 2/3 complex subunit 4              | P59998 | ARPC4    | 258 | 263 | 54,8 | 33,9 | 5  | 3  |      |      |        |        | 1,68 | 0,0131 | 3,08   |        | 0,002  |        |        |        |
| Actin-related protein 2/3 complex subunit 5              | O15511 | ARPC5    | 294 | 225 | 51   | 64,9 | 4  | 4  | 1,42 | 1,66 | 0,0057 | 0,0155 | 2,04 | 0,0012 | 4,18   | 3,20   | 0,0001 | 0,0001 |        |        |
| Acylamino-acid-releasing enzyme                          | P13798 | APEH     | 285 | 528 | 13,8 | 7,7  | 3  | 2  | 1,49 | 1,58 | 0,0341 |        | 2,24 | 0,0001 | 3,66   |        | 0      |        |        |        |
| ADAM 10 precursor                                        | O14672 | ADAM10   | 435 | 680 | 17,1 | 5,9  | 2  | 1  | 1,02 | 0,85 | 0,6714 |        |      |        | 1,86   |        | 0,0314 |        |        |        |
| Adenylate kinase 2                                       | Q5EB54 | AK2      | 363 | 363 | 36,6 | 21,6 | 3  | 2  | 1,52 |      | 0,0001 |        | 2,50 | 0,0056 |        |        |        |        |        |        |
| Adenylyl cyclase-associated protein                      | Q5T0S2 | CAP1     | 97  | 125 | 37,3 | 35   | 8  | 4  | 1,47 | 1,51 | 0      | 0,0209 | 2,25 | 0      | 4,54   | 3,81   | 0      | 0,0006 |        |        |
| ADP-ribosylation factor 3                                | P61204 | ARF3     | 373 | 678 | 37,6 | 13,3 | 3  | 1  | 1,52 |      | 0,0436 |        |      |        | 4,71   |        | 0,0022 |        |        |        |
| Afamin precursor                                         | P43652 | AFM      | 328 | 163 | 17,5 | 24,4 | 2  | 4  | 1,27 | 1,62 | 0,0041 | 0      | 0,69 | 0,042  | 1,38   | 2,06   | 0,0045 | 0      |        |        |
| Aging-associated protein 2                               | Q2TU77 | ST13     | 277 | 321 | 23,9 | 23,7 | 3  | 2  | 1,63 | 1,77 | 0,3307 |        |      |        |        | 3,00   |        | 0,0204 |        |        |
| Aging-associated protein 4                               | Q2TU75 | CLUS     | 204 | 207 | 18   | 17,8 | 7  | 5  |      | 1,30 |        | 0,0284 | 0,52 | 0,29   | 0,0004 | 0,0488 | 0,67   | 0,85   | 0,0075 | 0,2698 |
| Agrin precursor                                          | O00468 | AGRN     | 20  | 45  | 21,8 | 13,3 | 22 | 9  | 1,25 | 1,95 | 0      | 0,0001 | 0,40 |        | 0,0004 | 1,37   | 1,66   | 0,0001 | 0,0022 |        |
| AKR1A1 protein                                           | Q6IAZ4 | AKR1A1   | 152 | 133 | 36,9 | 29,5 | 5  | 4  | 1,47 | 1,53 | 0,0205 | 0,0379 | 2,29 | 0,0006 | 3,90   | 3,45   | 0,0001 | 0,0013 |        |        |
| AKR1B1 protein                                           | Q6FGA4 | AKR1B1   | 287 | 191 | 27,5 | 26   | 4  | 5  | 1,60 | 1,40 | 0,0006 | 0,0025 | 2,40 | 0,0009 | 4,42   | 3,29   | 0,0002 | 0      |        |        |
| Aldehyde dehydrogenase 1 family, member A1               | Q5SYR1 | ALDH1A1  | 103 | 121 | 28,3 | 25,8 | 8  | 5  | 1,57 | 1,82 | 0,0017 | 0,0008 | 2,03 | 0,0007 | 3,66   | 3,95   | 0      | 0      |        |        |
| Aldose 1-epimerase                                       | Q96C23 | GALM     | 260 | 295 | 46,7 | 23,7 | 4  | 2  |      | 1,57 |        | 0,0318 | 1,79 | 0,0258 | 3,25   | 3,18   | 0,0066 | 0,0067 |        |        |
| Allograft inflammatory factor 1                          | Q4V347 | AIF1     | 390 |     | 44,2 |      | 2  |    | 1,55 |      | 0,0378 |        | 1,98 | 0,011  | 5,66   |        | 0,005  |        |        |        |
| Alpha-1-antitrypsin precursor                            | P01009 | SERPINA1 | 70  | 80  | 39,7 | 34,9 | 15 | 9  | 0,91 | 1,57 | 0,0371 | 0,0002 | 0,62 | 0,36   | 0,0001 | 0,0002 | 0,82   | 0,96   | 0,0604 | 0,8332 |
| Alpha-2-HS-glycoprotein precursor                        | P02765 | AHSG     | 581 | 278 | 18,8 | 19,4 | 1  | 2  | 1,35 | 1,40 | 0,2776 | 0,012  |      | 0,75   |        | 0,0104 |        | 2,46   | 0,0446 |        |
| Alpha-2-macroglobulin precursor                          | P01023 | A2M      | 3   | 5   | 54,8 | 40,1 | 78 | 48 | 0,82 | 1,01 | 0      | 0,8919 | 0,48 | 0,26   | 0      | 0      | 0,49   | 0,50   | 0      | 0      |
| Alpha-actinin-4                                          | O43707 | ACTN4    | 56  | 81  | 44,6 | 25,8 | 25 | 13 | 1,27 | 1,64 | 0,0015 | 0,0024 | 1,89 | 0,0002 | 2,98   | 3,54   | 0      | 0      |        |        |
| Alpha-galactosidase A (Fragment)                         | Q6LER7 | GLA      | 491 |     | 11,4 |      | 2  |    |      |      |        |        |      |        | 1,25   |        | 0,0312 |        |        |        |
| Aminopeptidase B                                         | Q9H4A4 | RNPEP    | 208 | 407 | 22,6 | 10,6 | 5  | 2  | 1,29 |      | 0,0429 |        | 2,12 | 0,0075 | 3,49   |        | 0,0001 |        |        |        |
| Amyloid beta A4 protein precursor                        | P05067 | APP      | 262 | 276 | 14   | 11   | 5  | 3  |      |      |        |        |      |        | 1,24   | 1,41   | 0,3024 | 0,462  |        |        |
| Amyloid-like protein 2 precursor                         | Q06481 | APLP2    | 141 | 91  | 16,1 | 20,1 | 7  | 8  | 0,89 |      | 0,0198 |        | 0,61 | 0,30   | 0,0042 | 0,0062 | 0,79   | 0,73   | 0,186  | 0,1292 |
| Angiotensin-converting enzyme, somatic isoform precursor | P12821 | ACE      | 346 | 421 | 12,8 | 6,5  | 2  | 1  |      |      |        |        | 1,06 | 0,98   | 0,631  | 0,8318 | 1,30   | 1,86   | 0,048  | 0,0227 |
| Annexin A1                                               | Q5TZZ9 | ANXA1    | 79  | 85  | 56,1 | 38,4 | 11 | 7  | 1,81 | 1,80 | 0,0006 | 0,0041 | 1,85 | 0,001  | 3,63   | 3,36   | 0      | 0      |        |        |
| Annexin A11                                              | Q6ICS0 | ANXA11   | 80  | 139 | 23,4 | 17,4 | 11 | 5  | 1,61 | 2,27 | 0,0013 | 0,0108 | 2,13 | 0,0056 | 3,73   | 4,31   | 0,0002 | 0,0003 |        |        |
| Annexin A2                                               | Q8TBV2 | ANXA2    | 31  | 29  | 62   | 56,6 | 18 | 17 | 1,69 | 2,18 | 0      | 0      | 1,75 | 0      | 3,21   | 3,41   | 0      | 0      |        |        |
| Annexin A4                                               | Q6P452 | ANXA4    | 436 |     | 25,8 |      | 2  |    | 1,74 |      | 0,0073 |        | 2,04 | 0,0036 | 3,71   |        | 0,0043 |        |        |        |
| Annexin A5                                               | Q6FHB3 | ANXA5    | 69  | 42  | 52,5 | 44,4 | 12 | 10 | 1,65 | 1,64 | 0      | 0      | 1,75 | 0,0001 | 2,40   | 2,28   | 0      | 0      |        |        |
| Annexin A6                                               | P08133 | ANXA6    | 239 | 277 | 25   | 17,2 | 3  | 3  | 1,58 | 2,22 | 0,0002 | 0,0038 | 1,82 | 0,0004 | 2,97   | 3,71   | 0      | 0,0037 |        |        |
| APEX nuclease (Multifunctional DNA repair enzyme) 1      | Q5TZP7 | APEX1    | 263 | 187 | 34   | 23,9 | 4  | 4  | 1,47 | 1,93 | 0,0257 | 0,0267 |      |        | 2,51   | 3,61   | 0,0113 | 0      |        |        |

|                                                                            |        |          |     |     |      |      |    |    |      |      |        |        |      |      |        |        |      |      |        |        |
|----------------------------------------------------------------------------|--------|----------|-----|-----|------|------|----|----|------|------|--------|--------|------|------|--------|--------|------|------|--------|--------|
| Apolipoprotein A-II precursor                                              | P02652 | APOA2    | 506 | 525 | 27   | 19   | 2  | 1  | 1,41 |      | 0,0423 |        | 1,45 |      | 0,0599 |        | 1,65 |      | 0,0205 |        |
| Apolipoprotein C-I precursor                                               | P02654 | APOC1    | 368 | 488 | 30,1 | 32,5 | 3  | 1  |      |      |        |        | 0,59 | 0,70 | 0,1569 |        |      |      |        |        |
| Apolipoprotein E precursor                                                 | P02649 | APOE     | 24  | 21  | 77   | 66,9 | 30 | 19 | 1,21 | 1,17 | 0,0028 | 0,0102 | 0,40 | 0,15 | 0      | 0      | 0,72 | 0,47 | 0,01   | 0      |
| Apoptosis-associated speck-like protein containing a CARD                  | Q9ULZ3 | PYCARD   | 471 | 424 | 28,7 | 32,8 | 2  | 1  | 1,41 |      | 0,0096 |        |      |      |        |        | 4,21 | 3,44 | 0,0297 | 0,0438 |
| ARHA protein (Fragment)                                                    | Q9BVT0 | RHOA     | 566 | 425 | 39,6 | 21,2 | 2  | 1  |      |      |        |        |      |      |        |        | 3,95 |      | 0,0298 |        |
| ARHGDI1 protein                                                            | Q6IBM5 | ARHGDI1  | 403 | 339 | 29,4 | 26   | 2  | 2  | 1,35 |      | 0,0343 |        | 1,95 |      | 0,0097 |        | 3,70 | 4,59 | 0,0015 | 0,0396 |
| ARP3 actin-related protein 3 homolog variant (Fragment)                    | Q59FV6 | ACTR3    | 148 | 118 | 33,6 | 23   | 9  | 7  | 1,40 | 1,59 | 0,0088 | 0,1984 | 2,18 |      | 0,0012 |        | 3,98 | 2,56 | 0,0006 | 0,0396 |
| Asparaginyl-tRNA synthetase variant (Fragment)                             | Q53GU6 | NARS     | 381 | 422 | 12,6 | 7,8  | 3  | 1  | 1,49 | 1,69 | 0,0138 | 0,2186 | 2,07 |      | 0,0172 |        | 3,57 | 3,68 | 0,0029 | 0,04   |
| Aspartate aminotransferase, cytoplasmic                                    | P17174 | GOT1     | 498 |     | 13,1 |      | 2  |    |      |      |        |        |      |      |        |        | 3,78 |      | 0,0222 |        |
| ATP6V1G1 protein                                                           | Q6IB33 | ATP6V1G1 | 380 | 593 | 43,2 | 22   | 3  | 1  |      |      |        |        | 2,37 |      | 0,0021 |        | 4,76 |      | 0,0019 |        |
| ATP-dependent DNA helicase 2 subunit 2                                     | P13010 | XRCC5    | 376 | 568 | 15,3 | 7,2  | 2  | 1  | 1,72 |      | 0,001  |        | 2,59 |      | 0,0005 |        | 4,22 |      | 0,0004 |        |
| Basigin precursor                                                          | P35613 | BSG      | 317 | 436 | 18,2 | 13   | 3  | 1  |      | 1,96 |        | 0,0119 | 1,58 |      | 0,0146 |        | 2,66 | 3,59 | 0,0084 | 0,0465 |
| B-cell receptor-associated protein 31 variant (Fragment)                   | Q53G72 | BCAP31   | 578 | 275 | 22   | 19,9 | 1  | 3  |      | 2,30 |        | 0,0063 |      |      |        |        |      | 9,10 |        | 0,006  |
| Beta-2-microglobulin                                                       | Q540F8 | B2M      | 415 | 309 | 37   | 35,3 | 3  | 3  | 1,32 | 1,56 | 0,0225 | 0,0026 | 0,69 | 0,58 | 0,028  | 0,1099 | 1,15 | 1,28 | 0,0193 | 0,0465 |
| Beta-hexosaminidase beta chain precursor                                   | P07686 | HEXB     | 99  | 164 | 24,8 | 16,7 | 8  | 4  | 1,26 | 1,97 | 0,0002 | 0,0009 | 0,71 | 0,61 | 0,01   | 0,118  |      | 2,39 |        | 0,0018 |
| Biliverdin reductase A precursor                                           | P53004 | BLVRA    | 382 |     | 23,3 |      | 3  |    | 1,41 |      | 0,0113 |        |      |      |        |        | 3,35 |      | 0,0256 |        |
| Brain acid soluble protein 1                                               | P80723 | BASP1    | 83  | 99  | 75,3 | 56,8 | 10 | 7  | 1,26 |      | 0,005  |        | 1,61 | 1,44 | 0,0001 |        | 2,66 |      | 0      |        |
| Bridging integrator 2                                                      | Q9UBW5 | BIN2     | 414 |     | 13,5 |      | 2  |    | 1,38 |      | 0,0489 |        | 1,79 |      | 0,0026 |        | 3,44 |      | 0,0034 |        |
| BTB/POZ domain-containing protein KCTD12                                   | Q96CX2 | KCTD12   | 691 | 316 | 21,9 | 15,7 | 1  | 2  | 2,50 | 2,48 |        |        |      |      |        |        |      |      |        |        |
| CALM3 protein                                                              | Q9BRL5 | CALM3    |     | 111 |      | 34,7 |    | 7  |      | 1,83 |        | 0,0169 |      |      |        |        |      | 3,43 |        | 0,0003 |
| Calmodulin                                                                 | P62158 | CALM1    | 137 |     | 51,7 |      | 10 |    | 1,37 |      | 0,0293 |        | 1,98 |      | 0,0036 |        | 3,99 |      | 0,0003 |        |
| Calpastatin isoform a variant (Fragment)                                   | Q59HE3 | CAST     | 212 | 332 | 21,2 | 11,7 | 6  | 2  |      |      |        |        |      |      |        |        | 4,39 | 4,65 | 0,0205 | 0,0204 |
| CALR protein                                                               | Q6IAT4 | CALR     | 94  | 184 | 29,3 | 25,2 | 7  | 3  | 1,20 | 1,45 | 0,0447 | 0,001  | 1,58 |      | 0      |        | 2,10 | 3,14 | 0      | 0      |
| Calsyntenin-1 precursor                                                    | O94985 | CLSTN1   | 85  | 167 | 22,7 | 11,6 | 8  | 3  | 1,14 | 1,31 | 0,0489 | 0,0412 |      |      |        |        | 1,22 |      | 0,0192 |        |
| Capping protein (Actin filament) muscle Z-line, alpha 2 variant (Fragment) | Q53GE2 | CAPZA2   | 534 | 418 | 19,9 | 18,9 | 5  | 2  | 1,30 |      | 0,0125 |        |      |      |        |        | 3,15 | 3,30 | 0,2618 |        |
| Capping protein (Actin filament) muscle Z-line, beta                       | Q32Q68 | CAPZB    | 162 | 126 | 38,5 | 32,4 | 9  | 7  | 1,42 | 1,95 | 0,0003 | 0,0018 | 2,31 |      | 0,0046 |        | 3,90 | 4,29 | 0,0006 | 0      |
| Carbonic anhydrase 2                                                       | P00918 | CA2      | 172 | 95  | 48,1 | 39,6 | 7  | 8  | 1,42 | 1,65 | 0,0074 | 0,0039 | 2,25 |      | 0,0048 |        | 3,49 | 3,52 | 0,0003 | 0      |
| Carbonyl reductase [NADPH] 1                                               | P16152 | CBR1     | 209 | 237 | 39,7 | 26,7 | 6  | 3  | 1,60 |      | 0,01   |        | 2,09 |      | 0,0089 |        | 3,85 | 2,71 | 0,0003 | 0,0438 |
| Carboxypeptidase M precursor                                               | P14384 | CPM      | 89  | 219 | 32,1 | 20,8 | 13 | 3  |      |      |        |        | 1,26 |      | 0,0319 |        | 1,62 |      | 0,0007 |        |
| Cat eye syndrome critical region protein 1 precursor                       | Q9NZK5 | CECR1    | 71  | 70  | 36   | 35,4 | 12 | 7  | 1,25 | 1,42 | 0,0001 | 0,0026 | 0,64 | 0,33 | 0,0001 | 0,0012 |      |      |        |        |
| Catalase                                                                   | P04040 | CAT      | 128 | 83  | 32,5 | 20,9 | 8  | 8  | 1,24 | 1,73 | 0,0042 | 0,0332 | 1,88 |      | 0,0001 |        | 3,09 | 3,42 | 0      | 0,0031 |
| Cathepsin B precursor                                                      | P07858 | CTSB     | 108 | 94  | 25,7 | 28,6 | 11 | 7  | 1,41 | 2,04 | 0,001  | 0,0001 | 0,68 | 0,39 | 0,004  | 0,0132 |      | 1,47 |        | 0,0287 |

|                                                                                     |        |        |     |     |      |      |    |    |      |      |        |        |      |      |        |        |      |        |        |        |
|-------------------------------------------------------------------------------------|--------|--------|-----|-----|------|------|----|----|------|------|--------|--------|------|------|--------|--------|------|--------|--------|--------|
| Cathepsin D precursor                                                               | P07339 | CTSD   | 75  | 57  | 45,9 | 37,4 | 17 | 13 | 1,27 | 1,85 | 0      | 0,0002 | 0,64 | 0,50 | 0,0001 | 0,0122 | 2,03 | 0,0001 |        |        |
| Cathepsin H                                                                         | Q96NY6 | CTSH   | 255 | 305 | 21,8 | 22,4 | 4  | 2  | 1,24 |      | 0,0681 |        | 1,10 | 1,24 | 0,7536 |        |      |        |        |        |
| Cathepsin L1                                                                        | Q5T8F0 | CTSL1  | 218 | 242 | 22,8 | 19,6 | 6  | 3  |      | 2,69 |        | 0,0067 |      |      |        | 1,75   | 2,45 | 0,0387 | 0,0389 |        |
| Cathepsin Z precursor                                                               | Q9UBR2 | CTSZ   | 251 | 180 | 28,1 | 20,5 | 6  | 4  | 1,20 | 1,87 | 0,0015 | 0,0055 | 0,44 | 0,29 | 0,0002 | 0,0417 | 0,72 | 0,0012 |        |        |
| Cation-independent mannose-6-phosphate receptor precursor                           | P11717 | IGF2R  | 23  | 68  | 18,8 | 11,2 | 20 | 6  |      | 1,54 |        | 0,0007 | 2,19 | 2,37 | 0      | 0,001  | 2,37 | 3,91   | 0      | 0      |
| CD109 antigen precursor                                                             | Q6YHK3 | CD109  | 466 | 345 | 10,7 | 7,1  | 2  | 2  | 0,88 |      | 0,0227 |        |      |      |        | 1,36   | 2,12 | 0,0275 | 0,0391 |        |
| CD166 antigen precursor                                                             | Q13740 | ALCAM  | 158 | 114 | 23,7 | 16,6 | 6  | 8  |      | 1,50 |        | 0,0001 | 1,16 | 1,35 | 0,0643 | 0,1056 | 1,53 | 2,90   | 0      | 0      |
| CD44 molecule (Fragment)                                                            | Q9H5A7 | CD44   | 93  | 127 | 21,2 | 18,5 | 11 | 6  |      | 1,50 |        | 0,0505 | 1,63 | 0,82 | 0,0002 | 0,0242 | 2,43 | 2,36   | 0      | 0,0057 |
| CD48 protein                                                                        | Q8MGR0 | CD48   | 389 | 439 | 23,1 | 13,6 | 3  | 1  | 1,27 |      | 0,0224 |        | 1,73 |      | 0,0027 |        | 2,24 |        | 0,0123 |        |
| CD82 molecule                                                                       | Q7Z2D4 | CD82   | 745 | 469 | 13,1 | 16,9 | 2  | 2  |      |      |        |        |      |      |        | 1,96   | 2,08 |        |        |        |
| CDC37 cell division cycle 37 homolog                                                | Q53YA2 | CDC37  | 240 | 506 | 42,9 | 12,4 | 4  | 1  | 1,51 | 1,64 | 0,045  | 0,1996 | 2,35 |      | 0,0049 |        | 4,88 | 4,60   | 0,0006 | 0,0378 |
| CDNA FLJ25678 fis, clone TST04067, highly similar to                                | Q8N7G1 | NP     | 130 | 145 | 39,6 | 27,3 | 10 | 5  | 1,24 | 1,96 | 0,0143 | 0,0239 | 1,51 |      | 0,0076 |        | 2,39 | 3,65   | 0,0003 | 0,0067 |
| PURINE NUCLEOSIDE PHOSPHORYLASE                                                     |        |        |     |     |      |      |    |    |      |      |        |        |      |      |        |        |      |        |        |        |
| cDNA FLJ31747 fis, clone NT2RI2007377, highly similar to                            | Q96MX4 | EWSR1  | 489 |     | 22,1 |      | 2  |    |      |      |        |        |      |      |        |        | 3,66 |        | 0,0185 |        |
| RNA-BINDING PROTEIN EWS                                                             |        |        |     |     |      |      |    |    |      |      |        |        |      |      |        |        |      |        |        |        |
| cDNA FLJ78206, highly similar to Homo sapiens lipoprotein lipase (LPL), mRNA        | A8K2M5 | LPL    |     | 194 |      | 22,1 |    | 4  |      |      |        |        |      |      |        |        |      | 1,23   |        | 0,0189 |
| cDNA FLJ78212, highly similar to Human prolidase (imidodipeptidase) mRNA            | A8K416 | PEPD   | 171 |     | 18,5 |      | 7  |    |      |      |        |        | 1,87 |      | 0,0011 |        | 2,97 |        | 0      |        |
| cDNA FLJ78433, highly similar to Homo sapiens chaperonin containing TCP1, subunit 5 | A8K2X8 | CCT5   | 214 | 314 | 17,4 | 15   | 6  | 2  | 1,58 | 2,62 | 0,0039 | 0,0234 | 2,42 |      | 0,0015 |        | 4,88 | 4,70   | 0,0001 | 0,0102 |
| Cell division control protein 42 homolog precursor                                  | P60953 | CDC42  | 543 | 398 | 71,8 | 9,9  | 2  | 2  |      |      |        |        |      |      |        |        | 4,97 |        | 0,0218 |        |
| Chaperonin containing TCP1, subunit 3 (Gamma) variant (Fragment)                    | Q59H77 | CCT3   | 292 | 132 | 21,8 | 24,4 | 3  | 4  | 1,35 | 1,94 | 0,0457 | 0,001  | 2,20 | 1,34 | 0,0049 | 0,0387 | 3,94 | 4,33   | 0,0004 | 0,0001 |
| Chaperonin containing TCP1, subunit 8 (Theta) variant (Fragment)                    | Q53HU0 | CCT8   | 88  | 179 | 36,3 | 21,9 | 8  | 4  | 1,47 | 1,63 | 0,0107 | 0,1454 | 2,36 |      | 0,0003 |        | 4,40 | 3,45   | 0      | 0,0027 |
| Chitinase-3-like protein 1 precursor                                                | P36222 | CHI3L1 | 60  | 35  | 52   | 53,5 | 20 | 18 |      | 1,26 |        | 0,0085 | 0,46 | 0,27 | 0      | 0,0012 | 0,53 | 0,63   | 0,0001 | 0,0429 |
| Chitotriosidase-1 precursor                                                         | Q13231 | CHIT1  | 92  | 53  | 27,7 | 35,2 | 14 | 15 | 1,06 | 1,04 |        | 0,8301 |      | 0,23 |        | 0,0009 |      |        |        |        |
| Chloride intracellular channel 1                                                    | Q5SRT3 | CLIC1  | 127 | 212 | 46,5 | 28,6 | 8  | 6  | 1,51 | 1,90 | 0,0022 | 0,0155 | 1,94 |      | 0,0036 |        | 3,77 | 3,59   | 0,0009 | 0,0027 |
| Chloride intracellular channel protein 4                                            | Q9Y696 | CLIC4  | 474 | 423 | 21   | 10,3 | 5  | 3  |      |      |        |        | 1,94 |      | 0,0159 |        | 3,04 | 5,20   | 0,044  | 0,0229 |
| Clathrin heavy chain 1                                                              | Q00610 | CLTC   | 44  | 26  | 29,3 | 23,4 | 15 | 16 | 1,46 | 1,71 | 0      | 0      | 1,96 |      | 0      |        | 3,48 | 2,99   | 0      | 0      |
| Clathrin light chain A                                                              | P09496 | CLTA   | 463 | 375 | 18,6 | 25,8 | 2  | 3  | 1,51 | 1,64 | 0,0391 | 0,1442 | 2,14 |      | 0,0006 |        | 4,53 | 2,93   | 0,0048 | 0,0143 |
| Clathrin, light polypeptide                                                         | Q53Y37 | CLTB   | 407 |     | 25,1 |      | 2  |    | 1,35 |      | 0,001  |        | 2,19 |      | 0,0126 |        | 4,32 |        | 0,0011 |        |

|                                                            |        |         |     |     |      |      |    |   |      |      |        |        |      |        |        |        |        |        |        |        |
|------------------------------------------------------------|--------|---------|-----|-----|------|------|----|---|------|------|--------|--------|------|--------|--------|--------|--------|--------|--------|--------|
| Coactosin-like protein                                     | Q14019 | COTL1   | 170 | 172 | 45,8 | 40,1 | 8  | 4 | 1,35 | 1,84 | 0,0012 | 0      | 2,06 | 0      | 4,24   | 4,24   | 0      | 0      |        |        |
| Coagulation factor XIII, A1 polypeptide                    | Q9BX29 | F13A1   | 289 | 349 | 18,9 | 12,3 | 3  | 2 | 1,10 | 1,26 | 0,2562 | 0,6361 |      |        | 1,59   |        | 0,0038 |        |        |        |
| Cofilin-1                                                  | P23528 | CFL1    | 110 | 154 | 77,7 | 41   | 8  | 5 | 1,60 | 1,88 | 0      | 0,0005 | 2,64 | 0      | 6,25   | 4,67   | 0      | 0      |        |        |
| Collagen alpha-1(VI) chain precursor                       | P12109 | COL6A1  | 118 | 155 | 27,1 | 14,2 | 9  | 5 | 1,01 | 1,01 | 0,9407 | 0,6877 | 0,68 | 0,35   | 0,0119 | 0,0012 | 0,95   | 0,88   | 0,5922 | 0,249  |
| Colony stimulating factor 1                                | Q5VVF4 |         | 180 | 203 | 21,1 | 16,6 | 6  | 4 | 0,92 | 0,91 | 0,7942 | 0,5302 |      | 0,72   |        | 0,0017 |        |        |        |        |
| Complement C1q subcomponent subunit C precursor            | P02747 | C1QC    | 279 | 290 | 31,4 | 22   | 8  | 5 | 1,21 | 1,75 | 0,0381 | 0,0003 | 0,67 | 0,53   | 0,019  | 0,5544 |        |        |        |        |
| Complement component 1, q subcomponent, B chain (Fragment) | Q5T960 | C1QB    | 295 | 218 | 35,1 | 34,2 | 7  | 3 | 1,24 | 2,00 | 0,0019 | 0,0201 |      |        |        |        |        |        |        |        |
| Complement factor B                                        | Q5JP67 | CFB     | 387 |     | 13,9 |      | 2  |   | 2,97 |      | 0,0118 |        | 1,63 | 0,0323 |        | 4,26   |        | 0,004  |        |        |
| Coronin, actin binding protein, 1C variant (Fragment)      | Q59EA2 | CORO1C  | 95  | 90  | 31,7 | 27   | 8  | 6 | 1,39 | 1,80 | 0,0064 | 0,0001 | 1,89 | 0,0011 |        | 3,67   | 2,95   | 0      | 0,0005 |        |
| Coronin-1A                                                 | P31146 | CORO1A  | 165 | 105 | 30,2 | 22,8 | 6  | 5 | 1,35 | 1,75 | 0,008  | 0,0013 | 2,19 | 0      |        | 4,20   | 3,56   | 0      | 0      |        |
| Coronin-1B                                                 | Q9BR76 | CORO1B  | 325 | 663 | 20,9 | 18,6 | 3  | 0 | 1,34 |      | 0,0078 |        | 2,21 | 0,004  |        | 3,83   |        | 0,0007 |        |        |
| CTSS protein                                               | Q6FHS5 | CTSS    | 131 | 169 | 41,7 | 32,3 | 6  | 3 |      | 1,39 |        | 0,005  | 0,66 | 0,65   | 0,0015 | 0,2136 |        |        |        |        |
| C-type lectin domain family 11 member A precursor          | Q9Y240 | CLEC11A | 273 | 267 | 29,4 | 25,4 | 3  | 3 | 0,97 | 1,01 | 0,5133 |        | 0,72 | 0,0096 |        |        |        |        |        |        |
| Cullin-associated NEDD8-dissociated protein 1              | Q86VP6 | CAND1   | 421 | 502 | 12,7 | 8,1  | 2  | 1 |      |      |        |        |      |        |        | 2,92   |        | 0,0188 |        |        |
| C-X-C motif chemokine 10 precursor                         | P02778 | CXCL10  | 562 | 475 | 44,9 | 19,4 | 1  | 2 |      |      |        |        |      |        |        |        | 10,63  |        | 0,0418 |        |
| Cystatin B                                                 | Q76LA1 | CSTB    | 282 | 220 | 59,2 | 57,1 | 4  | 4 |      |      |        |        |      |        |        | 4,62   | 5,17   | 0,0142 | 0,011  |        |
| Cystatin-C precursor                                       | P01034 | CST3    | 228 | 240 | 48   | 26,7 | 7  | 4 | 1,12 |      | 0,0232 |        | 0,79 | 0,64   | 0,114  | 0,5879 | 1,23   | 1,43   | 0,0522 | 0,1957 |
| Cytochrome b-245 heavy chain                               | P04839 | CYBB    | 542 | 354 | 11,2 | 6,7  | 1  | 2 | 2,06 |      | 0,0037 |        | 3,02 | 0,0077 |        | 4,93   | 4,58   | 0,0043 | 0,0224 |        |
| Cytochrome c                                               | P99999 | CYCS    | 307 | 322 | 48,6 | 54,3 | 4  | 1 | 1,35 |      | 0,0084 |        | 1,83 | 0,0061 |        | 3,45   |        | 0,0055 |        |        |
| Cytoplasmic FMR1-interacting protein 1                     | Q7L576 | CYFIP1  | 316 | 486 | 15,1 | 7,4  | 3  | 1 | 1,83 | 2,03 | 0,0047 |        | 1,93 | 0,0564 |        | 3,98   | 3,89   | 0,0063 |        |        |
| Cytosol aminopeptidase                                     | P28838 | LAP3    | 76  | 144 | 41,2 | 23,7 | 10 | 5 | 1,31 | 1,71 | 0,0042 | 0,0145 | 2,16 | 0,0066 |        | 3,59   | 5,77   | 0,0003 | 0,0001 |        |
| Cytosolic non-specific dipeptidase                         | Q96KP4 | CNDP2   | 104 | 123 | 42,3 | 32   | 9  | 5 | 1,48 | 1,99 | 0,0017 | 0,0046 | 2,34 | 0,0003 |        | 4,12   | 4,62   | 0      | 0,0025 |        |
| Diazepam binding inhibitor, splice form 1c                 | Q4VWZ6 | DBI     | 375 | 326 | 59,1 | 67,1 | 6  | 2 | 1,45 |      | 0,0085 |        | 2,36 | 0,0158 |        | 6,27   | 4,85   | 0,0023 | 0,0036 |        |
| Dihydrolipoyl dehydrogenase, mitochondrial precursor       | P09622 | DLD     | 433 |     | 17,7 |      | 2  |   |      |      |        |        | 1,44 | 0,0214 |        | 2,19   |        | 0,0043 |        |        |
| Dihydropyrimidinase-like 2 variant (Fragment)              | Q59GB4 | DPYSL2  | 298 | 280 | 26,1 | 14,2 | 3  | 2 | 1,34 | 2,24 | 0,0018 | 0,0024 | 1,93 | 0,0008 |        | 3,69   | 4,50   | 0,0005 | 0,0018 |        |
| Dipeptidyl-peptidase 1 precursor                           | P53634 | CTSC    | 385 | 300 | 13,4 | 11   | 4  | 2 | 1,30 |      | 0,0149 |        |      |        |        | 1,54   |        | 0,0422 |        |        |
| DnaJ homolog subfamily C member 3 precursor                | Q13217 | DNAJC3  | 541 |     | 18,7 |      | 2  |   |      |      |        |        |      |        |        | 1,89   |        | 0,0156 |        |        |
| Drebrin-like protein                                       | Q9UJU6 | DBNL    | 286 | 404 | 26,7 | 10,7 | 4  | 3 |      |      |        |        |      |        |        |        | 5,27   |        | 0,0494 |        |
| Dynactin 2 variant (Fragment)                              | Q53H88 | DCTN2   | 431 | 266 | 15,5 | 17,2 | 2  | 3 |      |      |        |        | 1,92 | 0,0018 |        | 3,39   | 3,53   | 0,0087 | 0,0543 |        |
| Dystroglycan 1                                             | Q969J9 | DAG1    | 384 | 385 | 16,2 | 13,1 | 2  | 2 | 0,74 | 0,70 | 0,2262 |        |      |        |        | 1,29   | 1,50   | 0,3212 |        |        |
| EF-hand domain-containing protein D2                       | Q96C19 | EFHD2   | 157 | 165 | 48,8 | 44,2 | 7  | 5 |      |      |        |        | 1,78 | 1,60   | 0,0103 | 0,1114 | 3,71   | 5,30   | 0      | 0,1071 |
| EH domain-containing protein 4                             | Q9H223 | EHD4    | 333 |     | 20,5 |      | 3  |   | 1,27 |      | 0,0028 |        | 1,60 | 0,0154 |        | 2,57   |        | 0,0005 |        |        |

|                                                                |        |         |     |     |      |      |    |    |      |      |        |        |      |        |        |        |        |        |        |        |
|----------------------------------------------------------------|--------|---------|-----|-----|------|------|----|----|------|------|--------|--------|------|--------|--------|--------|--------|--------|--------|--------|
| EIF4G1 variant protein (Fragment)                              | Q4LE58 | EIF4G1  | 326 | 353 | 10,9 | 12,1 | 3  | 1  | 1,64 | 1,85 | 0,001  | 0,0196 | 2,32 | 0,0002 | 4,68   | 3,40   | 0,0001 | 0,0033 |        |        |
| Elongation factor 1-alpha                                      | Q6IPT9 | EEF1A1  | 117 | 181 | 35,9 | 22,7 | 9  | 3  | 1,54 | 2,02 | 0,0016 | 0,0004 | 2,39 | 0,0006 | 5,58   | 6,02   | 0      | 0      |        |        |
| Elongation factor 1-beta                                       | P24534 | EEF1B2  | 420 | 334 | 19,6 | 21,8 | 2  | 1  |      | 1,90 |        | 0,0093 | 2,82 | 0,0329 | 6,21   | 4,13   | 0,0036 | 0,0018 |        |        |
| Elongation factor 2                                            | P13639 | EEF2    | 35  | 51  | 33,9 | 28,1 | 17 | 9  | 1,50 | 1,72 | 0      | 0,0016 | 2,48 | 0      | 4,93   | 4,66   | 0      | 0      |        |        |
| EMILIN-2 precursor                                             | Q9BXX0 | EMILIN2 | 27  | 25  | 30,9 | 27,4 | 18 | 12 | 1,09 | 1,32 | 0,0002 | 0,0002 | 0,78 | 0,37   | 0,0017 | 0      | 0,99   | 1,04   | 0,8762 | 0,699  |
| Enolase                                                        | Q6FHV6 | ENO2    | 693 | 452 | 23,7 | 24,9 | 2  | 2  |      |      |        |        |      |        | 2,79   | 2,90   |        |        |        |        |
| Enolase (Fragment)                                             | Q53FT9 | ENO1    | 25  | 34  | 68,7 | 48,9 | 26 | 14 | 1,41 | 1,57 | 0      | 0      | 2,33 | 0      | 3,82   | 3,56   | 0      | 0      |        |        |
| Erythrocyte band 7 integral membrane protein                   | P27105 | STOM    | 343 | 438 | 28,5 | 13,9 | 3  | 2  | 1,78 |      | 0,0163 |        | 1,79 | 0,0038 | 2,78   |        | 0,0033 |        |        |        |
| Eukaryotic initiation factor 4A-I                              | P60842 | EIF4A1  | 146 |     | 37,7 |      | 7  |    | 1,62 |      | 0      |        | 1,83 | 0,0002 | 3,65   |        | 0      |        |        |        |
| Eukaryotic translation elongation factor 1 gamma               | Q53YD7 | EEF1G   | 192 | 301 | 22,4 | 16,7 | 6  | 2  | 1,49 |      | 0,012  |        | 2,35 | 0,0152 | 5,51   |        | 0,0005 |        |        |        |
| Eukaryotic translation initiation factor 3 subunit B           | P55884 | EIF3B   | 546 | 317 | 11,3 | 13,5 | 3  | 1  |      |      |        |        | 2,47 | 2,30   | 0,1356 |        |        |        |        |        |
| Eukaryotic translation initiation factor 3, subunit A          | Q24JU4 | EIF3A   | 891 | 377 | 13,7 | 11,7 | 1  | 2  |      | 1,68 |        | 0,0286 |      |        |        | 3,07   |        | 0,0039 |        |        |
| Eukaryotic translation initiation factor 4B variant (Fragment) | Q53HQ2 | EIF4B   | 459 | 477 | 29,8 | 12,3 | 2  | 1  | 1,36 |      | 0,0391 |        |      |        | 3,18   |        | 0,0466 |        |        |        |
| Eukaryotic translation initiation factor 5A-1                  | P63241 | EIF5A   | 357 | 668 | 26   | 17,5 | 2  | 0  |      |      |        |        | 2,47 | 0,0356 | 5,10   | 5,72   | 0,032  | 0,0068 |        |        |
| Extracellular matrix protein 1                                 | Q8IZ60 | ECM1    | 66  | 38  | 41,1 | 34,8 | 15 | 15 | 1,06 | 1,23 | 0,2561 | 0,0013 | 0,72 | 0,33   | 0,0011 | 0,0375 |        | 0,68   | 0,0435 |        |
| Ezrin                                                          | P15311 | EZR     | 283 | 178 | 31,4 | 28,2 | 10 | 8  |      | 2,04 |        | 0,0174 | 1,95 | 0,0036 | 4,10   | 4,79   | 0      | 0,0002 |        |        |
| FABP3 protein                                                  | Q6IBD7 | FABP3   | 167 | 174 | 66,9 | 66,9 | 7  | 3  | 1,70 | 1,74 | 0,0017 | 0      | 2,31 | 0,0001 | 5,34   | 3,85   | 0      | 0,0034 |        |        |
| FABP4 protein                                                  | Q6IBA1 | FABP4   | 512 | 367 | 22,7 | 19,7 | 3  | 2  |      |      |        |        |      |        |        | 2,61   |        | 0,0485 |        |        |
| F-actin-capping protein subunit alpha-1                        | P52907 | CAPZA1  | 184 | 98  | 43,7 | 43   | 8  | 7  | 1,38 |      | 0,0444 |        | 1,68 | 0,0014 | 3,35   |        | 0      |        |        |        |
| Far upstream element-binding protein 2                         | Q92945 | KHSRP   | 337 | 669 | 21,3 | 15,5 | 3  | 1  | 1,96 |      | 0,0193 |        | 3,22 | 0,0021 | 6,09   |        | 0,0012 |        |        |        |
| Farnesyl diphosphate synthase                                  | Q96G29 | FDPS    | 358 | 285 | 12,4 | 15,3 | 3  | 3  | 1,39 |      | 0,0098 |        | 2,36 | 0,0192 | 4,62   | 3,75   | 0,0129 | 0,001  |        |        |
| Fatty acid synthase                                            | Q4LE83 | FASN    | 91  | 252 | 15,5 | 8,8  | 7  | 3  | 1,77 | 1,76 | 0      | 0,0191 | 2,22 | 0      | 4,42   | 3,86   | 0      | 0,0017 |        |        |
| Fatty acid-binding protein, epidermal                          | Q01469 | FABP5   | 234 | 209 | 50,4 | 55,6 | 5  | 4  | 1,52 | 1,71 | 0,0482 | 0,0207 | 2,32 | 0,0002 | 5,78   | 3,92   | 0,0012 | 0,0065 |        |        |
| Fermitin family homolog 3                                      | Q86UX7 | FERMT3  | 114 | 138 | 24,4 | 21,1 | 7  | 5  | 1,46 | 1,70 | 0,0014 | 0,0002 | 1,86 | 0,0004 | 3,31   | 3,03   | 0      | 0      |        |        |
| Ferritin                                                       | Q6NZ44 | FTH1    | 268 | 210 | 32,8 | 33,3 | 8  | 4  | 1,21 |      | 0,0495 |        | 1,88 | 0,0313 | 2,85   |        | 0,0076 |        |        |        |
| Ferritin, light polypeptide                                    | Q96CU0 | FTL     | 265 | 259 | 43,4 | 28,6 | 3  | 2  | 1,22 |      | 0,0277 |        | 2,05 | 0,0129 | 3,58   | 3,62   | 0,0048 | 0,0021 |        |        |
| Fibrinogen-like 2 variant (Fragment)                           | Q53GD2 | FGL2    | 249 | 223 | 29,4 | 20,3 | 4  | 3  |      | 1,83 |        | 0,0002 | 1,14 | 0,96   | 0,0989 | 0,3782 | 1,61   | 2,61   | 0,0001 | 0,0001 |
| Filamin A, alpha                                               | Q5HY55 | FLNA    | 1   | 1   | 48,2 | 43,6 | 92 | 81 | 1,31 | 1,71 | 0      | 0      | 1,73 | 0      | 2,77   | 3,14   | 0      | 0      |        |        |
| FK506 binding protein 5                                        | Q5TGM6 | FKBP5   | 790 |     | 11,2 |      | 2  |    |      |      |        |        |      |        | 9,63   |        | 0,0061 |        |        |        |
| FK506-binding protein 4                                        | Q02790 | FKBP4   | 443 |     | 22,2 |      | 3  |    | 1,30 |      | 0,022  |        | 1,53 | 0,0325 | 3,56   |        | 0,0061 |        |        |        |
| Flavin reductase                                               | P30043 | BLVRB   | 364 | 410 | 27,7 | 11,7 | 3  | 2  | 1,47 | 1,48 | 0,0513 |        |      |        | 3,85   |        | 0,0132 |        |        |        |
| FP1047                                                         | Q71RH4 |         | 472 | 518 | 19,3 | 11,6 | 2  | 1  | 1,74 |      | 0,0434 |        | 2,15 | 0,002  | 5,25   |        | 0,012  |        |        |        |
| Fructose-bisphosphate aldolase                                 | Q6FII0 | ALDOA   | 32  | 22  | 57,7 | 51,9 | 24 | 21 | 1,30 | 1,57 | 0,0002 | 0      | 1,81 | 0      | 3,07   | 3,10   | 0      | 0      |        |        |

|                                                                                     |        |          |     |     |      |      |    |    |      |      |        |        |      |        |        |        |        |        |        |        |
|-------------------------------------------------------------------------------------|--------|----------|-----|-----|------|------|----|----|------|------|--------|--------|------|--------|--------|--------|--------|--------|--------|--------|
| FSCN1 protein (Fragment)                                                            | Q96IH1 | FSCN1    | 111 | 141 | 25,8 | 16,4 | 7  | 5  | 1,32 | 1,56 | 0      | 0,0395 | 1,85 | 0      | 3,01   | 3,65   | 0      | 0,0069 |        |        |
| Full-length cDNA clone CSODL010YH08 of B cells<br>(Ramos cell line) of Homo sapiens | Q53XC0 | EIF2S1   | 540 |     | 21   |      | 2  |    | 1,62 |      | 0,0466 |        | 2,81 | 0,0209 | 4,96   |        | 0,0174 |        |        |        |
| Galectin-1                                                                          | P09382 | LGALS1   | 156 | 129 | 57   | 46,7 | 14 | 6  | 1,62 | 1,81 | 0,0015 | 0,0003 | 2,66 | 0,001  | 5,53   | 4,41   | 0,0004 | 0,0178 |        |        |
| Galectin-3                                                                          | Q6IBA7 | LGALS3   | 197 | 176 | 42,4 | 35,6 | 6  | 4  | 1,60 | 1,61 | 0,001  | 0,0014 | 2,19 | 0,0024 | 4,36   | 3,24   | 0,0001 | 0,0105 |        |        |
| Galectin-3-binding protein precursor                                                | Q08380 | LGALS3BP | 65  | 87  | 29,6 | 24,3 | 13 | 8  | 2,61 | 4,11 | 0      | 0      | 1,38 | 0,0019 | 2,69   | 3,33   | 0      | 0,0001 |        |        |
| Galectin-9                                                                          | O00182 | LGALS9   | 845 | 350 | 6,8  | 9,3  | 1  | 2  |      | 1,55 |        | 0,0367 | 0,93 | 0,70   |        |        |        |        |        |        |
| GDI2 protein                                                                        | Q6IAT1 | GDI2     | 34  | 60  | 64   | 51   | 15 | 8  | 1,45 | 1,66 | 0,0001 | 0      | 1,94 | 0      | 3,62   | 3,49   | 0      | 0      |        |        |
| Gelsolin                                                                            | Q5T0I2 | GSN      | 19  | 17  | 48,3 | 49,2 | 29 | 23 |      | 1,45 |        | 0,0001 | 0,84 | 0,0278 | 1,33   | 1,66   | 0,0075 | 0,0038 |        |        |
| Glia maturation factor gamma                                                        | Q8TDZ6 | GMFG     | 419 | 291 | 31,7 | 31,7 | 2  | 2  | 1,71 | 1,53 | 0,3981 | 0,1064 |      |        |        |        |        |        |        |        |
| Glucosamine-6-phosphate isomerase                                                   | P46926 | GNPDA1   | 434 |     | 25,3 |      | 2  |    |      |      |        |        | 1,65 | 0,0379 | 2,80   |        | 0,0077 |        |        |        |
| Glucose-6-phosphate 1-dehydrogenase                                                 | P11413 | G6PD     | 173 | 137 | 28,9 | 30,5 | 7  | 4  | 1,65 | 1,78 | 0,0003 | 0,0015 | 3,21 | 0      | 6,68   | 5,60   | 0      | 0,0001 |        |        |
| Glucose-6-phosphate isomerase                                                       | P06744 | GPI      | 64  | 62  | 38,5 | 36,6 | 17 | 10 | 1,46 | 1,69 | 0      | 0,0001 |      |        | 3,29   | 3,44   | 0      | 0      |        |        |
| Glucosidase 2 subunit beta precursor                                                | P14314 | PRKCSH   | 345 | 361 | 15,9 | 14,6 | 4  | 3  | 0,96 | 0,99 | 0,6859 |        | 1,34 | 0,0348 | 1,97   | 1,81   | 0,0027 |        |        |        |
| Glucosylceramidase precursor                                                        | P04062 | GBA      | 405 |     | 9,5  |      | 2  |    | 1,24 |      | 0,0384 |        |      |        | 1,95   |        | 0,0112 |        |        |        |
| Glutathione peroxidase 3 precursor                                                  | P22352 | GPX3     | 351 | 346 | 29,7 | 19   | 3  | 2  | 0,98 | 1,12 | 0,8129 | 0,6516 | 0,74 | 0,0486 | 0,84   | 0,98   | 0,1627 | 0,6895 |        |        |
| Glutathione reductase, mitochondrial precursor                                      | P00390 | GSR      | 188 | 175 | 24,5 | 24,7 | 6  | 4  | 1,45 | 1,41 | 0,012  | 0,0706 | 2,43 | 0      | 4,02   | 2,95   | 0      | 0,0001 |        |        |
| Glutathione S-transferase P                                                         | P09211 | GSTP1    | 219 | 273 | 45,7 | 36,2 | 5  | 3  | 1,53 |      | 0,0175 |        | 2,19 | 0,0002 | 3,53   | 4,16   | 0      | 0,0257 |        |        |
| Glutathione synthetase                                                              | P48637 | GSS      | 409 | 723 | 19,4 | 9,7  | 2  | 0  | 1,45 | 1,36 | 0,0005 | 0,4247 | 1,92 | 0,0007 | 3,16   | 3,05   | 0      | 0,1083 |        |        |
| Glutathione transferase omega-1                                                     | P78417 | GSTO1    | 139 | 150 | 51,5 | 40,7 | 6  | 4  | 1,55 | 1,76 | 0,0002 | 0,0014 | 2,34 | 0      | 4,38   | 3,58   | 0      | 0,0002 |        |        |
| Glyceraldehyde 3-phosphate dehydrogenase (Fragment)                                 | Q53X65 | GAPDH    | 59  | 49  | 52,8 | 49,9 | 22 | 15 | 1,32 | 1,71 | 0,0003 | 0,0043 | 2,41 | 0,001  | 4,27   | 4,03   | 0      | 0      |        |        |
| Glycerol-3-phosphate dehydrogenase [NAD+], cytoplasmic                              | P21695 | GPD1     | 361 | 307 | 22,6 | 12,9 | 3  | 2  | 1,96 |      | 0,0371 |        | 2,63 | 0,0222 | 4,71   |        | 0,0126 |        |        |        |
| Glycogen phosphorylase, liver form                                                  | P06737 | PYGL     | 402 | 299 | 21,8 | 14,9 | 2  | 2  | 1,57 |      | 0,0265 |        | 2,45 | 0,0077 | 4,26   | 3,99   | 0,0004 | 0,0043 |        |        |
| Glycosyltransferase 25 family member 1 precursor                                    | Q8NBJ5 | GLT25D1  | 133 |     | 27   |      | 6  |    |      |      |        |        | 2,19 | 0      | 3,94   |        | 0      |        |        |        |
| Glycyl-tRNA synthetase                                                              | P41250 | GARS     | 398 | 675 | 16,5 | 8,1  | 2  | 1  |      |      |        |        | 1,91 | 0,0459 | 3,25   |        | 0,0278 |        |        |        |
| Glypican-4 precursor                                                                | O75487 | GPC4     | 86  | 143 | 30   | 21,8 | 10 | 5  |      | 1,24 |        | 0,0343 | 0,50 | 0,0353 | 1,28   | 1,15   | 0,1161 | 0,347  |        |        |
| GM2 activator protein                                                               | Q6LBL5 | GM2A     | 269 | 198 | 25,4 | 23,3 | 4  | 4  |      | 1,83 |        | 0,0001 | 0,46 | 0,44   | 0,0001 | 0,0493 | 0,77   | 1,44   | 0,0036 | 0,0411 |
| GNB2L1 protein (Fragment)                                                           | Q6FH47 | GNB2L1   | 267 | 253 | 28,4 | 17,9 | 4  | 3  | 1,46 | 1,97 | 0,0176 | 0,0146 | 2,88 | 0,0085 | 5,31   | 5,31   | 0,0015 | 0,0007 |        |        |
| GRB2 protein (Fragment)                                                             | Q6ICN0 | GRB2     | 350 | 667 | 48,9 | 27,2 | 3  | 0  | 1,20 | 2,13 | 0,1286 | 0,0876 | 1,44 | 0,0609 | 2,48   | 2,82   | 0,0153 | 0,029  |        |        |
| Growth-inhibiting protein 17                                                        | Q2TU34 | FBP1     | 51  | 48  | 62,1 | 53   | 18 | 12 | 1,36 | 1,75 | 0      | 0,0453 | 1,87 | 0,0004 | 3,12   | 3,57   | 0      | 0,0005 |        |        |
| Guanine nucleotide-binding protein G(i), alpha-2 subunit                            | P04899 | GNAI2    | 264 | 391 | 31,8 | 16,3 | 4  | 1  |      | 2,11 |        | 0,0064 |      |        | 2,67   | 3,21   | 0,0007 | 0,0077 |        |        |
| GYG1 protein (Fragment)                                                             | Q8N5Y3 | GYG1     | 620 |     | 13   |      | 2  |    |      |      |        |        |      |        | 3,91   |        | 0,0198 |        |        |        |
| Haptoglobin precursor                                                               | P00738 | HP       | 52  | 36  | 44,3 | 42,6 | 18 | 14 | 1,34 | 1,39 | 0      | 0,0065 | 1,23 | 0,0076 | 1,54   | 1,88   | 0,0001 | 0,0002 |        |        |

|                                                                      |        |           |     |     |      |      |    |    |      |      |        |        |      |      |        |        |       |       |        |        |
|----------------------------------------------------------------------|--------|-----------|-----|-----|------|------|----|----|------|------|--------|--------|------|------|--------|--------|-------|-------|--------|--------|
| HCLS1 protein                                                        | Q6IBK9 | HCLS1     | 178 | 148 | 26,5 | 17,3 | 5  | 4  |      | 1,82 |        | 0,0023 | 1,74 |      | 0,0025 |        | 3,24  | 3,71  | 0,0009 | 0,0002 |
| Heat shock 70kDa protein 1A variant                                  | Q59EJ3 | HSPA1A    | 106 | 69  | 31,3 | 30,8 | 15 | 14 | 1,45 | 1,93 | 0,0004 | 0,0164 | 1,92 |      | 0,0001 |        | 3,38  | 4,91  | 0      | 0,0194 |
| Heat shock 70kDa protein 4                                           | Q2TAL4 | HSPA4     | 115 | 166 | 28,3 | 19,2 | 6  | 4  | 1,43 | 1,54 | 0,0008 | 0,0001 | 2,24 |      | 0      |        | 3,71  | 3,16  | 0      | 0      |
| Heat shock cognate 71 kDa protein                                    | P11142 | HSPA8     | 17  | 16  | 50   | 43,8 | 28 | 22 | 1,36 | 1,97 | 0,0003 | 0,0001 | 1,71 |      | 0,0001 |        | 3,21  | 4,35  | 0      | 0      |
| Heat shock protein 105 kDa                                           | Q92598 | HSPH1     | 224 | 358 | 21,8 | 10,1 | 4  | 2  | 1,44 | 1,50 | 0,0017 | 0,0524 | 1,99 |      | 0,0002 |        | 3,66  | 3,33  | 0      | 0,0436 |
| Heat shock protein beta-1 (HSP27)                                    | P04792 | HSPB1     | 215 | 205 | 46,8 | 35,1 | 5  | 5  | 1,42 | 1,58 | 0,0158 | 0,1245 | 2,08 |      | 0,0101 |        | 3,96  | 3,86  | 0,0049 | 0,0027 |
| Heat shock protein HSP 90-alpha                                      | P07900 | HSP90AA1  | 126 | 100 | 39,9 | 33,6 | 23 | 15 | 1,70 | 1,92 | 0      | 0,0021 | 2,29 |      | 0      |        | 4,14  | 4,18  | 0      | 0,0001 |
| Heat shock protein HSP 90-beta                                       | P08238 | HSP90AB1  | 21  | 20  | 41,3 | 43,4 | 24 | 21 | 1,76 | 2,10 | 0,0002 | 0,0002 | 2,60 | 1,34 | 0,0019 | 0,0257 | 5,45  | 5,11  | 0      | 0      |
| Heme-binding protein 2                                               | Q9Y5Z4 | HEBP2     | 517 |     | 28,3 |      | 2  |    |      |      |        |        |      |      |        |        | 3,63  |       | 0,0359 |        |
| Hemopexin precursor                                                  | P02790 | HPX       | 312 | 170 | 17,8 | 19,7 | 3  | 4  | 1,30 | 1,52 | 0,0012 | 0,037  |      |      |        |        |       | 2,22  |        | 0,0065 |
| Heparan sulfate proteoglycan 2                                       | Q5SZI3 | HSPG2     | 155 | 234 | 10,6 | 8,8  | 8  | 2  |      |      |        |        | 0,61 | 0,29 | 0,0087 | 0,0366 |       |       |        |        |
| Heterogeneous nuclear ribonucleoprotein A1                           | P09651 | HNRNPA1   | 347 | 327 | 37,1 | 40,9 | 3  | 4  | 1,43 | 2,01 | 0,057  | 0,0324 | 1,82 |      | 0,0315 |        | 3,86  | 3,33  | 0,0019 | 0,0007 |
| Heterogeneous nuclear ribonucleoprotein D0                           | Q14103 | HNRNPD    | 458 | 463 | 21,4 | 21,3 | 2  | 1  |      |      |        |        | 2,27 |      | 0,0341 |        | 5,29  |       | 0,0015 |        |
| Heterogeneous nuclear ribonucleoprotein Q                            | O60506 | SYNCRIP   | 372 | 303 | 19,9 | 19,7 | 3  | 2  | 1,46 | 1,30 | 0,0096 | 0,5235 | 1,77 |      | 0,0009 |        | 3,34  | 3,10  | 0,0003 | 0,0389 |
| Heterogeneous nuclear ribonucleoproteins A2/B1                       | P22626 | HNRNPA2B  | 134 | 103 | 33,4 | 37,4 | 6  | 8  | 1,32 | 1,87 | 0,0304 | 0,0159 | 1,93 |      | 0,0049 |        | 3,51  | 3,32  | 0,0009 | 0,0008 |
| Hexokinase 3 variant (Fragment)                                      | Q59H08 | HK3       | 67  | 50  | 23,4 | 19   | 13 | 11 | 1,43 | 1,85 | 0,0002 | 0,0002 | 2,02 |      | 0,0009 |        | 3,72  | 3,31  | 0      | 0      |
| Histidyl-tRNA synthetase                                             | Q52NV4 | HARS      | 529 | 513 | 17,5 | 12,4 | 2  | 1  | 1,77 | 1,66 | 0,1398 |        |      |      |        |        |       |       |        |        |
| Histone H2A type 3                                                   | Q7L7L0 | HIST3H2A  | 482 |     | 47,7 |      | 2  |    |      |      |        |        |      |      |        |        | 2,56  |       | 0,0184 |        |
| Histone H2B type 1-M                                                 | Q99879 | HIST1H2BM | 256 | 272 | 57,1 | 50,8 | 6  | 4  | 1,39 | 1,52 | 0,097  | 0,0924 | 1,52 |      | 0,0882 |        | 2,58  | 2,49  | 0,0042 | 0,0293 |
| Histone H4                                                           | Q0VAS5 | HIST4H4   | 221 | 160 | 59,2 | 50,5 | 6  | 6  | 1,34 | 1,49 | 0,0049 | 0,0008 | 1,46 |      | 0,0007 |        | 2,34  | 2,05  | 0,0001 | 0,0005 |
| HLA class II histocompatibility antigen, DRB1-1 beta chain precursor | P04229 | HLA-DRB1  | 163 | 369 | 30,8 | 18,7 | 6  | 2  | 1,28 |      | 0      |        | 1,28 |      | 0      |        | 1,66  |       | 0      |        |
| HNRPK protein                                                        | Q6IBN1 | HNRNPK    | 266 | 153 | 31,3 | 14,2 | 4  | 5  |      | 1,82 |        | 0,0162 |      |      |        |        | 4,50  | 3,41  | 0,0156 | 0,0073 |
| HSPC027                                                              | Q9Y6E3 | PSMD13    | 619 | 364 | 13   | 12,7 | 1  | 2  |      |      |        |        | 1,63 | 1,60 | 0,5261 |        |       |       |        |        |
| HSPE1 protein                                                        | Q53X54 | HSPE1     | 280 |     | 51   |      | 4  |    | 1,61 |      | 0,0196 |        | 2,10 |      | 0,0041 |        | 4,30  |       | 0      |        |
| Hydroxyacylglutathione hydrolase                                     | Q16775 | HAGH      | 715 | 440 | 26,2 | 11,9 | 1  | 2  |      |      |        |        |      |      |        |        | 4,14  | 4,13  |        |        |
| IFIT1                                                                | Q5T7J1 | IFIT1     |     | 257 |      | 20,3 |    | 3  |      |      |        |        |      |      |        |        |       | 7,61  |        | 0,0548 |
| IFIT2                                                                | Q8IZ03 | IFIT2     | 468 | 480 | 13,8 | 8,9  | 2  | 1  |      |      |        |        |      |      |        |        | 14,03 | 15,72 | 0,0158 | 0,0457 |
| IFIT3                                                                | Q5T765 | IFIT3     | 297 | 343 | 21   | 13,5 | 3  | 3  | 1,64 | 1,55 | 0,1708 |        |      |      |        |        | 5,03  |       | 0,0496 |        |
| Immunity-related GTPase family Q protein                             | Q8WZA9 | IRGQ      | 475 |     | 15,9 |      | 2  |    | 1,37 |      | 0,0228 |        | 1,82 |      | 0,0109 |        | 4,32  |       | 0,0372 |        |
| Integrin alpha-L precursor                                           | P20701 | ITGAL     | 428 | 473 | 9,9  | 8,3  | 2  | 1  |      |      |        |        | 1,73 |      | 0,0057 |        | 2,28  | 5,46  | 0      | 0,0437 |
| Integrin alpha-X precursor                                           | P20702 | ITGAX     | 112 | 39  | 17,3 | 15,6 | 10 | 10 |      | 1,69 |        | 0,0004 | 0,92 | 0,83 | 0,374  | 0,2094 | 1,36  | 2,30  | 0,0064 | 0      |
| Integrin beta (Fragment)                                             | Q6PJ75 | ITGB2     | 26  | 27  | 40,8 | 33,3 | 21 | 16 |      | 1,64 |        | 0,0015 | 0,90 | 0,74 | 0,1796 | 0,1536 | 1,21  | 2,09  | 0,0048 | 0      |



|                                                                       |        |          |     |     |      |      |    |    |      |      |        |        |      |      |        |        |  |      |      |        |        |
|-----------------------------------------------------------------------|--------|----------|-----|-----|------|------|----|----|------|------|--------|--------|------|------|--------|--------|--|------|------|--------|--------|
| Integrin beta-3 precursor                                             | P05106 | ITGB3    | 300 | 248 | 13,5 | 8    | 4  | 3  |      |      |        |        |      |      |        |        |  |      | 1,76 | 1,78   | 0,1218 |
| Integrin, alpha 2b                                                    | Q17R67 | ITGAB    | 159 | 333 | 16,5 | 13,5 | 7  | 2  | 1,33 |      | 0,0081 |        | 1,31 | 1,10 | 0,1342 |        |  |      |      |        |        |
| Integrin, alpha M                                                     | Q4VAK2 | CD11B    | 39  | 65  | 22,4 | 19,2 | 21 | 11 |      | 1,48 |        | 0,0102 | 0,98 | 0,84 | 0,8395 | 0,394  |  | 1,32 | 2,44 | 0,0091 | 0,0003 |
| Integrin, beta 1                                                      | Q8WUM6 | ITGB1    | 259 | 414 | 23,2 | 8,1  | 4  | 2  |      |      |        |        |      |      |        |        |  | 2,10 | 2,05 | 0,0153 |        |
| Intercellular adhesion molecule 1                                     | Q5NKV8 | ICAM1    | 655 | 376 | 15   | 15,2 | 1  | 2  |      | 2,48 |        | 0,0067 | 1,20 | 1,37 |        | 0,5368 |  |      | 3,73 |        | 0,0473 |
| Interferon, gamma-inducible protein 30                                | Q8WU77 | IFI30    | 320 | 265 | 18   | 18   | 5  | 5  | 1,45 | 2,74 | 0,0491 | 0,0033 |      |      |        |        |  | 1,48 | 1,28 | 0,2372 | 0,6224 |
| Interleukin enhancer-binding factor 3                                 | Q12906 | ILF3     | 605 | 249 | 9,5  | 12,1 | 1  | 3  |      |      |        |        | 0,80 | 0,72 |        |        |  |      |      |        |        |
| ISG15 ubiquitin-like modifier                                         | Q5SVA4 | ISG15    | 432 | 335 | 50,9 | 24,9 | 2  | 2  | 1,66 |      | 0,0053 |        |      |      |        |        |  | 4,16 |      | 0,0132 |        |
| Junctional adhesion molecule-like precursor                           | Q86YT9 | AMICA1   | 438 | 430 | 13,7 | 11,9 | 2  | 1  |      |      |        |        | 0,69 | 0,51 |        |        |  |      | 2,00 |        | 0,0223 |
| Karyopherin (Importin) beta 1                                         | Q53XN2 | KPNB1    | 344 | 215 | 12,6 | 11,1 | 4  | 4  | 1,30 | 2,32 | 0,0259 | 0,0015 | 2,11 | 0,72 | 0,0085 | 0,0147 |  | 3,82 | 4,39 | 0,0017 | 0,0003 |
| Keratin, type I cytoskeletal 10                                       | P13645 | KRT10    | 149 | 64  | 20,1 | 22,4 | 6  | 10 | 0,62 | 6,08 | 0,018  | 0      | 0,43 |      | 0,0047 |        |  |      | 1,79 |        | 0,0167 |
| Keratin, type I cytoskeletal 9                                        | P35527 | KRT9     | 101 | 264 | 32,9 | 18,1 | 8  | 3  | 0,60 |      | 0,0007 |        | 0,39 | 0,36 | 0,0002 | 0,2199 |  | 0,69 | 1,50 | 0,0056 | 0,0139 |
| Keratin, type II cytoskeletal 1                                       | P04264 | KRT1     | 53  | 217 | 35,4 | 26,1 | 14 | 6  | 0,62 | 3,53 | 0      | 0,0005 | 0,41 |      | 0      |        |  | 0,79 | 2,11 | 0,004  | 0,0079 |
| Keratin, type II cytoskeletal 2 epidermal                             | P35908 | KRT2     | 202 | 86  | 28,4 | 29,9 | 6  | 7  | 0,54 | 6,80 | 0,0025 | 0,0105 | 0,55 |      | 0,0031 |        |  |      |      |        |        |
| Kunitz-type protease inhibitor 1 precursor                            | O43278 | SPINT1   | 160 | 206 | 21,7 | 13,4 | 6  | 4  |      |      |        |        | 1,15 |      | 0,0118 |        |  | 1,56 | 2,60 | 0,0007 | 0,0116 |
| KYNU protein                                                          | Q6I9T2 | KYNU     | 303 | 239 | 28,2 | 18,3 | 3  | 3  | 1,20 |      | 0,0128 |        | 1,65 |      | 0,0067 |        |  | 2,58 | 2,46 | 0,0021 | 0,0067 |
| Lamin-B1                                                              | P20700 | LMNB1    | 473 | 355 | 22,4 | 22,7 | 2  | 3  |      |      |        |        | 1,61 | 1,77 | 0,4662 | 0,2915 |  |      | 5,82 |        | 0,0228 |
| Leucine-rich repeat flightless-interacting protein 1                  | Q32MZ4 | LRRFIP1  | 210 | 77  | 16,1 | 27,4 | 5  | 9  | 1,49 | 2,46 | 0,0188 | 0,0256 | 1,94 |      | 0,0072 |        |  | 4,04 | 4,05 | 0,0003 | 0,0031 |
| Leukocyte common antigen precursor                                    | P08575 | PTPRC    | 98  | 128 | 15,1 | 9,8  | 8  | 6  | 1,35 | 2,52 | 0,0106 | 0,0333 | 1,76 | 1,59 | 0,0011 | 0,0119 |  | 2,65 |      | 0      |        |
| Leukocyte elastase inhibitor                                          | P30740 | SERPINB1 | 216 | 158 | 25,6 | 23,8 | 5  | 4  | 1,30 | 1,46 | 0,1172 | 0,0009 | 1,66 |      | 0,0021 |        |  | 2,65 | 2,94 | 0,0004 | 0,0003 |
| Leukocyte immunoglobulin-like receptor subfamily B member 4 precursor | Q8NHJ6 | LILRB4   | 457 | 401 | 8    | 9,4  | 3  | 2  | 1,07 | 1,23 | 0,4971 | 0,3767 |      |      |        |        |  | 1,86 | 2,38 | 0,0401 | 0,022  |
| LIM and SH3 domain protein 1                                          | Q14847 | LASP1    | 193 | 108 | 44,8 | 34,5 | 6  | 6  | 1,40 | 1,77 | 0,0083 | 0,0026 | 1,82 |      | 0,0374 |        |  | 4,00 | 4,39 | 0,0012 | 0,0002 |
| Liver carboxylesterase 1 precursor                                    | P23141 | CES1     | 425 | 341 | 9,2  | 10,9 | 2  | 2  |      |      |        |        | 1,78 |      | 0,0234 |        |  | 2,52 |      | 0,0244 |        |
| L-lactate dehydrogenase (L-lactate dehydrogenase B chain)             | Q5U077 | LDHB     | 74  | 92  | 47,6 | 41   | 14 | 8  | 1,35 | 1,83 | 0      | 0,0088 | 2,10 |      | 0      |        |  | 3,38 | 3,68 | 0      | 0      |
| L-lactate dehydrogenase A chain                                       | P00338 | LDHA     | 84  | 43  | 50   | 50,3 | 12 | 12 | 1,46 | 1,66 | 0      | 0,0024 | 2,22 |      | 0      |        |  | 3,56 | 3,21 | 0      | 0      |
| LPL protein                                                           | Q6IAV0 | LPL      | 194 |     | 27   |      | 5  |    |      |      |        |        |      |      |        |        |  | 1,41 |      | 0,0271 |        |
| LSP1 protein                                                          | Q6FHM3 | LSP1     | 121 | 109 | 54,3 | 48,4 | 11 | 7  |      | 1,77 |        | 0,0003 | 1,36 | 1,37 | 0,2648 | 0,1125 |  |      | 3,92 |        | 0      |
| LTA4H protein                                                         | Q6IAT6 | LTA4H    | 33  | 46  | 46   | 34,7 | 18 | 9  | 1,54 | 1,78 | 0,0001 | 0,0084 | 2,29 |      | 0      |        |  | 3,93 | 3,55 | 0      | 0,0001 |
| Lymphocyte cytosolic protein 1 (Plastin-2)                            | Q5TBN4 | LCP1     | 15  | 14  | 60,3 | 45,1 | 46 | 31 | 1,41 | 1,70 | 0      | 0      | 2,05 |      | 0      |        |  | 3,80 | 3,41 | 0      | 0      |
| Lysosomal alpha-glucosidase precursor                                 | P10253 | GAA      | 355 | 517 | 7,6  | 7,9  | 3  | 1  |      |      |        |        |      |      |        |        |  | 1,91 |      | 0,0415 |        |
| Lysozyme C precursor                                                  | P61626 | LYZ      | 151 | 124 | 54,7 | 54,7 | 12 | 10 |      |      |        |        | 0,37 | 0,21 | 0,0004 | 0,0014 |  | 0,51 | 0,48 | 0,0057 | 0,0013 |
| Macrophage colony-stimulating factor 1 receptor precursor             | P07333 | CSF1R    | 664 | 543 | 7,1  | 6,1  | 2  | 1  | 0,79 | 2,15 |        |        | 0,57 |      |        |        |  | 0,52 | 1,55 |        |        |

|                                                             |        |          |     |     |      |      |    |    |      |      |        |        |      |        |        |        |      |        |        |        |
|-------------------------------------------------------------|--------|----------|-----|-----|------|------|----|----|------|------|--------|--------|------|--------|--------|--------|------|--------|--------|--------|
| Macrophage metalloelastase precursor                        | P39900 | MMP12    | 40  | 101 | 37   | 27,5 | 17 | 3  | 1,21 | 2,68 | 0,0255 | 0      | 0,67 | 0,0052 |        | 2,30   |      | 0      |        |        |
| Macrophage scavenger receptor types I and II                | P21757 | MSR1     | 242 | 261 | 22,2 | 12,6 | 4  | 2  |      |      |        |        | 1,71 | 0,105  |        | 3,31   |      | 0,0074 |        |        |
| Macrophage-capping protein                                  | P40121 | CAPG     | 90  | 72  | 47,4 | 39,7 | 13 | 11 | 1,63 | 1,62 | 0,0084 | 0,0001 | 2,70 | 0,0008 |        | 6,89   | 4,07 | 0,0001 | 0      |        |
| Malate dehydrogenase (Fragment)                             | Q75MT9 | MDH2     | 222 | 171 | 47,2 | 26   | 4  | 4  |      |      |        |        | 1,54 | 0,0378 |        | 2,38   | 4,84 | 0,0128 | 0,0031 |        |
| Malate dehydrogenase, cytoplasmic                           | P40925 | MDH1     | 140 | 110 | 33,5 | 35   | 9  | 7  | 1,48 | 1,68 | 0,0002 | 0      | 2,29 | 0      |        | 3,96   | 3,61 | 0      | 0      |        |
| Mannose receptor C type 1-like protein 1                    | Q5VSK2 | MRC1L1   | 8   | 9   | 37,2 | 31,5 | 44 | 36 |      | 1,41 |        | 0      | 2,26 | 2,20   | 0      | 0      | 2,44 | 4,25   | 0      | 0      |
| Mannosidase, alpha, class 2B, member 1 variant (Fragment)   | Q59E90 | MAN2B1   | 38  | 40  | 29,9 | 20,3 | 18 | 13 |      | 2,00 |        | 0,0001 | 0,67 | 0,44   | 0      | 0,0001 |      | 2,18   |        | 0      |
| Matrilysin precursor                                        | P09237 | MMP7     | 318 | 238 | 29,2 | 24   | 4  | 3  |      | 1,65 |        | 0,0026 | 0,68 | 0,52   | 0,0452 | 0,0672 |      |        |        |        |
| Matrix metalloproteinase-9 precursor                        | P14780 | MMP9     | 14  | 11  | 50,5 | 50,8 | 40 | 31 |      | 1,24 |        | 0,0025 | 0,45 | 0,28   | 0      | 0      | 0,52 | 0,60   | 0      | 0,0002 |
| Membrane alanine aminopeptidase variant (Fragment)          | Q59E93 | ANPEP    | 77  | 37  | 22,7 | 18,4 | 10 | 12 | 1,17 | 2,13 | 0,001  | 0      | 1,33 | 0      |        | 1,86   | 3,20 | 0      | 0      |        |
| Metalloproteinase inhibitor 2 precursor                     | P16035 | TIMP2    | 150 | 149 | 35,9 | 34,6 | 9  | 6  | 1,18 | 1,50 | 0,002  | 0,0039 |      | 0,30   |        | 0,0133 | 1,43 |        | 0,0017 |        |
| MGAT1 protein                                               | Q6IBE3 | MGAT1    | 261 | 229 | 24,7 | 18,7 | 4  | 3  | 1,25 | 1,39 | 0,0016 | 0,2512 | 1,31 |        | 0,0169 |        | 1,93 |        | 0,0002 |        |
| MHC class I antigen                                         | Q7YQB0 | HLA-B    | 183 | 82  | 37,3 | 39,8 | 6  | 8  |      |      |        |        | 0,96 | 1,05   | 0,6034 | 0,904  |      |        |        |        |
| MHC class I antigen (Fragment)                              | Q6F3I9 | HLA-A    |     | 152 |      | 41   |    | 7  |      |      |        |        |      |        |        |        |      | 3,79   |        | 0,0154 |
| MHC class II antigen                                        | Q95IH1 | HLA-DRB1 | 782 | 695 | 25,9 | 30,1 | 5  | 3  |      |      |        |        |      |        |        |        | 1,26 |        | 0,0394 |        |
| MHC class II HLA-DQ-beta-1 (Fragment)                       | Q30098 | HLA-DQB1 | 290 |     | 45,2 |      | 3  |    |      |      |        |        |      |        |        |        | 1,45 |        | 0,0026 |        |
| Microtubule-associated protein 4                            | P27816 | MAP4     | 203 | 183 | 16,1 | 9,5  | 5  | 4  |      | 1,78 |        | 0,0008 | 1,56 |        | 0,0349 |        | 3,40 | 3,87   | 0,0001 | 0,0014 |
| Microtubule-associated protein RP/EB family member 1        | Q15691 | MAPRE1   | 327 |     | 28,7 |      | 3  |    | 1,71 |      | 0,0322 |        |      |        |        |        | 5,47 |        | 0,0022 |        |
| Moesin                                                      | P26038 | MSN      | 22  | 19  | 47,3 | 48,4 | 22 | 20 | 1,26 | 1,72 | 0,0001 | 0      | 1,79 | 0      |        |        | 3,07 | 3,45   | 0      | 0      |
| MxA                                                         | P20591 | MX1      | 195 | 308 | 23,3 | 14,5 | 5  | 2  | 1,95 | 2,02 | 0,048  |        |      |        |        |        | 7,43 | 10,07  | 0,0045 | 0,001  |
| Myoferlin                                                   | Q9NZM1 | MYOF     | 423 | 567 | 10,5 | 9,1  | 2  | 1  |      |      |        |        | 2,62 |        | 0,0366 |        | 5,38 |        | 0,008  |        |
| Myosin regulatory light chain                               | Q53X45 | MYL12A   | 227 | 195 | 48   | 36,8 | 5  | 4  | 1,39 | 1,53 | 0,0358 | 0,084  | 1,77 |        | 0,0384 |        | 3,32 | 2,47   | 0,0053 | 0,0274 |
| Myosin, light chain 6, alkali, smooth muscle and non-muscle | Q561V9 | MYL6     | 119 | 235 | 51,7 | 39,7 | 8  | 3  | 1,32 | 1,60 | 0,0052 | 0,0598 | 1,82 |        | 0,0198 |        | 3,08 | 3,18   | 0,0011 | 0,0128 |
| Myristoylated alanine-rich C-kinase substrate               | P29966 | MARCKS   | 233 | 201 | 27,4 | 24,7 | 4  | 4  |      |      |        |        | 1,90 |        | 0,0343 |        | 3,12 |        | 0,0179 |        |
| Nestin                                                      | P48681 | NES      | 313 | 548 | 11,8 | 13,3 | 3  | 1  | 1,44 | 3,37 | 0,0068 |        | 2,15 |        | 0,0183 |        | 4,33 |        | 0,0054 |        |
| Neudesin precursor                                          | Q9UMX5 | NENF     | 490 |     | 22,1 |      | 2  |    |      |      |        |        | 1,34 |        | 0,0098 |        | 2,79 |        | 0,0305 |        |
| Neuroblast differentiation-associated protein AHNAK         | Q09666 | AHNAK    | 5   | 6   | 39   | 35,8 | 44 | 37 | 1,51 | 2,20 | 0      | 0      | 2,11 | 1,37   | 0      | 0,0011 | 5,00 | 4,09   | 0      | 0      |
| Neuropilin-1                                                | Q6X907 | NRP1     | 55  | 61  | 28,3 | 24,6 | 15 | 8  |      | 1,51 |        | 0,0005 |      | 0,56   |        | 0,0029 | 1,29 | 1,42   | 0,0438 | 0,0026 |
| Neuropilin-2a(22)                                           | Q7LBX7 | NRP2     | 125 | 347 | 24,7 | 10,6 | 7  | 2  |      | 1,15 |        | 0,0183 | 1,08 | 0,91   | 0,1973 |        | 1,38 | 1,60   | 0,0008 | 0,0119 |
| Neutral alpha-glucosidase AB precursor                      | Q14697 | GANAB    | 331 |     | 14,8 |      | 2  |    |      |      |        |        |      |        |        |        | 1,56 |        | 0,0038 |        |
| Niban-like protein 1                                        | Q96TA1 | NIBL1    | 189 | 230 | 20,2 | 13,8 | 5  | 2  | 1,29 | 1,92 | 0,0034 | 0,0034 | 1,80 |        | 0,0068 |        | 3,18 | 3,97   | 0,0001 | 0      |
| Nicotinamide phosphoribosyltransferase                      | P43490 | NAMPT    | 497 |     | 12,6 |      | 2  |    |      |      |        |        | 1,91 |        | 0,0058 |        | 3,84 |        | 0,0111 |        |
| Niemann-Pick disease, type C2 variant (Fragment)            | Q53HV6 | NPC2     | 235 | 243 | 33,8 | 23,2 | 4  | 3  |      | 1,74 |        | 0,0388 |      |        |        |        | 1,70 | 3,64   | 0,0426 | 0,0026 |

|                                                            |        |          |     |     |      |      |    |    |      |      |        |        |      |        |        |        |        |        |        |
|------------------------------------------------------------|--------|----------|-----|-----|------|------|----|----|------|------|--------|--------|------|--------|--------|--------|--------|--------|--------|
| Non-muscle myosin heavy polypeptide 9                      | Q60FE2 | MYH9     | 2   | 3   | 45,1 | 33,5 | 69 | 41 | 1,36 | 1,49 | 0      | 0      | 1,80 | 0      | 3,00   | 2,83   | 0      | 0      |        |
| Nuclear migration protein nudC                             | Q9Y266 | NUDC     | 538 | 381 | 22,7 | 25,4 | 2  | 2  |      |      |        |        | 2,60 | 0,0382 | 5,25   |        | 0,0056 |        |        |
| Nucleobindin-1 precursor                                   | Q02818 | NUCB1    | 42  | 59  | 52,9 | 34,9 | 19 | 12 |      | 1,84 |        | 0,0001 |      | 0,53   | 0,0162 | 1,37   | 1,63   | 0,0193 | 0,0242 |
| Nucleolin                                                  | P19338 | NCL      | 198 | 102 | 28,6 | 25,9 | 6  | 6  | 1,85 | 2,05 | 0,0013 | 0      | 2,00 | 0,0037 |        | 3,88   | 3,65   | 0,0005 | 0      |
| Nucleophosmin                                              | P06748 | NPM1     | 191 | 228 | 43,5 | 20,4 | 6  | 5  | 1,70 | 1,78 | 0,0003 | 0,0001 | 2,52 | 0,0001 |        | 4,12   | 3,21   | 0,0003 | 0,0001 |
| Nucleoside diphosphate kinase                              | Q32Q12 | NME2     | 182 | 151 | 57,5 | 47,3 | 7  | 5  | 1,41 | 1,62 | 0,0084 | 0,0007 | 2,16 | 0      |        | 3,84   | 3,42   | 0      | 0      |
| Orosomuroid 1                                              | Q5U067 | ORM1     |     | 408 |      | 13,9 |    | 2  |      |      |        |        |      | 0,49   | 0,0129 |        | 2,02   |        | 0,0033 |
| p180/ribosome receptor                                     | A7BI36 | RRBP1    | 321 | 192 | 36   | 33,4 | 2  | 4  |      |      |        |        |      |        |        | 2,54   | 2,44   | 0,0595 | 0,1041 |
| Paired immunoglobulin-like type 2 receptor alpha precursor | Q9UKJ1 | PILRA    | 449 | 449 | 20,5 | 20,8 | 2  | 1  |      | 1,63 |        | 0,0342 |      |        |        | 1,12   | 1,10   | 0,0795 | 0,2744 |
| PC cell-derived growth factor                              | Q540U8 | GRN      | 120 | 200 | 22,6 | 12,7 | 8  | 4  | 1,37 |      | 0,0008 |        | 0,68 | 0,69   | 0,0188 |        | 1,28   |        | 0,0084 |
| Pentaxin-related protein PTX3                              | Q38M82 | PTX3     | 302 | 182 | 26,5 | 20,2 | 5  | 4  | 0,76 | 0,94 | 0,3424 | 0,9028 |      |        |        |        |        |        |        |
| Peptidyl-prolyl cis-trans isomerase                        | Q6IBH5 | PPIB     | 176 | 147 | 46,8 | 49,5 | 7  | 5  |      | 1,60 |        | 0,0001 |      | 0,57   | 0,0113 | 1,36   | 1,82   | 0,0077 | 0,0013 |
| Peptidyl-prolyl cis-trans isomerase A                      | P62937 | PPIA     | 135 | 93  | 73,3 | 56,4 | 13 | 8  | 1,55 | 1,93 | 0,0001 | 0,0001 | 2,57 | 0,002  |        | 4,80   | 4,82   | 0,0002 | 0      |
| Peroxiredoxin-1                                            | Q06830 | PRDX1    | 82  | 74  | 55,8 | 57,8 | 13 | 10 | 1,61 | 1,73 | 0,0001 | 0      | 2,73 | 0,0001 |        | 5,36   | 4,32   | 0      | 0      |
| Peroxiredoxin-6                                            | P30041 | PRDX6    | 243 | 302 | 33   | 25,9 | 4  | 2  | 1,23 | 1,37 | 0,1242 | 0,0266 | 1,82 | 0,018  |        | 3,14   | 3,77   | 0,0026 | 0,0081 |
| Phosphatidylethanolamine-binding protein 1                 | P30086 | PEBP1    | 237 | 260 | 49,2 | 25,7 | 4  | 3  |      | 1,96 |        | 0,0324 |      | 0,69   | 0,0214 | 3,51   | 4,60   | 0,0191 | 0,0329 |
| Phosphoglucomutase-1                                       | P36871 | PGM1     | 200 | 241 | 25,3 | 20,1 | 4  | 3  | 1,53 |      | 0,0037 |        | 1,98 | 0,0009 |        | 3,46   |        | 0      |        |
| Phosphoglucomutase-2                                       | Q96G03 | PGM2     | 288 | 319 | 26,3 | 11,3 | 3  | 2  | 1,44 | 1,59 | 0,1552 | 0,0471 | 2,19 | 0,0046 |        | 3,96   | 3,87   | 0,0003 | 0,038  |
| Phosphoglycerate kinase 1                                  | P00558 | PGK1     | 30  | 30  | 62,1 | 57,3 | 23 | 15 | 1,46 | 1,69 | 0      | 0      | 2,24 | 0      |        | 3,73   | 3,63   | 0      | 0      |
| Phosphoglycerate mutase 1                                  | Q6P6D7 | PGAM1    |     | 156 |      | 35,8 |    | 7  |      |      |        |        |      |        |        |        | 3,37   |        | 0,0288 |
| Phosphoglycolate phosphatase                               | A6NDG6 | PGP      | 379 | 711 | 17,8 | 19,9 | 3  | 1  |      |      |        |        | 2,15 | 0,0165 |        | 3,72   |        | 0,0159 |        |
| Phosphoinositide-3-kinase-interacting protein 1 precursor  | Q96FE7 | PIK3IP1  | 842 | 411 | 9,9  | 12,9 | 1  | 2  | 0,97 | 0,89 |        |        |      |        |        |        |        |        |        |
| Phospholipase D3                                           | Q8IV08 | PLD3     | 281 | 312 | 15,3 | 12,9 | 4  | 2  |      |      |        |        | 0,92 | 0,75   | 0,2522 |        | 1,46   |        | 0,0076 |
| Phosphorylase (Fragment)                                   | Q59GM9 | PYGB     | 557 |     | 13,3 |      | 2  |    | 1,89 |      | 0,0002 |        | 2,32 | 0,0009 |        | 4,75   |        | 0,0015 |        |
| Plasma alpha-L-fucosidase precursor                        | Q9BTY2 | FUCA2    | 276 |     | 16,1 |      | 4  |    | 1,37 |      | 0,0199 |        |      |        |        | 1,68   |        | 0,0182 |        |
| Plasma protease C1 inhibitor precursor                     | P05155 | SERPING1 | 211 | 107 | 26,6 | 29   | 5  | 6  | 2,52 | 2,30 | 0,0002 | 0,0002 | 1,31 | 0,0081 |        | 2,72   | 2,39   | 0,0001 | 0,0002 |
| Plasminogen activator inhibitor 1 RNA-binding protein      | Q8NC51 | SERBP1   | 467 | 224 | 29,7 | 22   | 4  | 6  | 1,29 | 1,49 | 0,4864 |        |      |        |        |        |        |        |        |
| Platelet factor 4 precursor                                | P02776 | PF4      | 448 | 435 | 48,5 | 64,8 | 2  | 1  | 1,48 |      | 0,0081 |        |      |        |        |        |        |        |        |
| Plectin 6                                                  | Q6S380 | PLEC1    | 4   | 2   | 28,2 | 28,2 | 45 | 45 | 1,47 | 2,00 | 0      | 0      | 1,96 | 0      |        | 4,01   | 4,00   | 0      | 0      |
| PLEK protein (Fragment)                                    | Q6FGQ1 | PLEK     | 306 | 419 | 31,4 | 18,6 | 3  | 1  | 1,52 | 1,56 | 0,0334 | 0,032  | 1,44 | 0,048  |        | 2,58   | 2,37   | 0,0091 | 0,0185 |
| Plexin domain-containing protein 2 precursor               | Q6UX71 | PLXDC2   | 272 | 318 | 25,1 | 12,9 | 4  | 2  |      |      |        |        |      |        |        |        | 2,08   |        | 0,0201 |
| Polyadenylate-binding protein 1                            | P11940 | PABPC1   |     | 188 |      | 22,6 |    | 4  |      | 2,29 |        | 0,0107 |      |        |        |        | 3,41   |        | 0,0019 |
| Probable serine carboxypeptidase CPVL precursor            | Q9H3G5 | CPVL     | 453 | 328 | 20,6 | 15,8 | 2  | 2  |      | 2,07 |        | 0,0217 | 0,83 | 0,98   | 0,5443 | 0,9316 |        | 2,31   | 0,0319 |

|                                                                   |        |         |     |     |      |      |    |    |      |      |        |        |      |      |        |        |      |      |        |        |
|-------------------------------------------------------------------|--------|---------|-----|-----|------|------|----|----|------|------|--------|--------|------|------|--------|--------|------|------|--------|--------|
| Profilin 1                                                        | Q53Y44 | PFN1    | 123 | 106 | 69,3 | 69,3 | 10 | 8  | 1,28 | 1,60 | 0,0097 | 0,0072 | 1,60 |      | 0,0171 |        | 2,92 | 3,04 | 0,0008 | 0,0022 |
| Progerin                                                          | Q6UYC3 | LMNA    | 28  | 15  | 52,4 | 56   | 19 | 21 | 1,37 | 1,72 | 0      | 0      | 1,76 |      | 0      |        | 3,42 | 3,38 | 0      | 0      |
| Programmed cell death 6-interacting protein                       | Q8WUM4 | PDCD6IP | 41  | 131 | 36,9 | 23,1 | 12 | 5  |      |      |        |        |      |      |        |        | 1,47 | 1,95 | 0      | 0,0008 |
| Proliferation-associated protein 2G4                              | Q9UQ80 | PA2G4   | 371 | 437 | 22,7 | 14,7 | 3  | 1  | 1,94 | 2,22 | 0,0194 | 0,0172 | 2,67 | 2,57 | 0,0009 | 0,0852 | 5,69 | 6,26 | 0,0011 | 0,0057 |
| Prolow-density lipoprotein receptor-related protein 1 precursor   | Q07954 | LRP1    | 7   | 7   | 17,5 | 14,4 | 43 | 34 |      | 1,50 |        | 0      | 1,86 | 1,69 | 0      | 0,0001 | 2,17 | 4,26 | 0      | 0      |
| Prosaposin                                                        | B1AVU8 | PSAP    | 62  | 44  | 27,2 | 25,4 | 12 | 11 | 1,36 | 2,42 | 0      | 0,0004 | 0,78 | 0,71 | 0,113  | 0,3089 | 1,44 | 2,54 | 0,0171 | 0,0024 |
| Prostaglandin D2 synthase 21kDa (Fragment)                        | Q5SQ09 | PTGDS   | 305 | 289 | 49,5 | 42   | 4  | 3  |      |      |        |        | 0,50 | 0,22 | 0,0045 | 0,0026 | 0,64 | 0,46 | 0,0432 | 0,0433 |
| Prostaglandin E synthase 3                                        | Q15185 | PTGES3  | 487 |     | 17,5 |      | 2  |    | 1,59 |      | 0,0411 |        | 2,07 |      | 0,027  |        | 4,49 |      | 0,0037 |        |
| Proteasome (Prosome, macropain) subunit, alpha type, 7 (Fragment) | Q5JXJ1 | PSMA7   | 274 | 446 | 31,5 | 18,8 | 4  | 1  | 1,41 | 1,63 | 0,0045 | 0,0157 | 2,06 |      | 0,0034 |        | 3,49 | 3,65 | 0,0002 | 0,0785 |
| Proteasome beta 1 subunit variant (Fragment)                      | Q53FT8 | PSMB1   | 241 | 254 | 56,4 | 36,9 | 5  | 2  | 1,29 | 1,81 | 0,0001 | 0,0055 | 1,76 |      | 0      |        | 2,83 | 3,01 | 0      | 0,0046 |
| Proteasome subunit alpha type                                     | Q5U0A0 | PSMA5   | 284 | 461 | 44,8 | 17   | 5  | 1  | 1,51 | 1,43 | 0,0245 |        | 2,30 |      | 0,002  |        | 3,72 |      | 0,0013 |        |
| Proteasome subunit alpha type                                     | Q53XP2 | PSMA4   | 311 | 292 | 24,9 | 27,6 | 2  | 1  | 1,42 | 1,34 | 0,0268 | 0,0361 | 1,88 |      | 0,0001 |        | 3,14 |      | 0,0001 |        |
| Proteasome subunit alpha type (Fragment)                          | A8MVJ4 |         | 96  | 193 | 44,4 | 36,6 | 10 | 4  | 1,47 | 1,83 | 0,0009 | 0,0153 | 2,15 |      | 0      |        | 3,58 | 3,19 | 0      | 0,0059 |
| Proteasome subunit alpha type (Fragment)                          | Q6ICS6 | PSMA2   | 396 | 403 | 28,6 | 26,1 | 2  | 1  | 1,11 | 1,24 | 0,7336 | 0,2746 |      |      |        |        |      |      |        |        |
| Proteasome subunit alpha type-3                                   | P25788 | PSMA3   | 250 | 666 | 40,8 | 12,9 | 5  | 0  | 1,27 | 1,24 | 0,1458 | 0,1715 |      |      |        |        | 3,03 |      | 0,043  |        |
| Proteasome subunit alpha type-6                                   | P60900 | PSMA6   | 181 | 226 | 43,9 | 22,8 | 6  | 3  | 1,27 | 1,65 | 0,0009 | 0,0035 | 1,82 |      | 0,0002 |        | 3,04 | 3,21 | 0      | 0,0228 |
| Proteasome subunit beta type                                      | Q6IAT9 | PSMB6   | 494 | 371 |      | 14,2 | 2  | 2  | 1,50 | 1,61 |        | 0,0201 |      |      |        |        |      | 2,31 |        | 0,0241 |
| Proteasome subunit beta type-2                                    | P49721 | PSMB2   | 205 | 233 | 42,8 | 30,4 | 6  | 3  | 1,68 | 1,65 | 0,0149 | 0,4695 | 2,40 |      | 0,0012 |        | 3,93 | 3,25 | 0,0009 | 0,0205 |
| Proteasome subunit beta type-8                                    | Q5QNR8 | PSMB8   | 245 | 177 | 29   | 30,1 | 5  | 4  | 1,38 | 1,64 | 0,0096 | 0,0003 |      |      |        |        | 2,45 | 3,42 | 0,0501 | 0,0001 |
| Proteasome subunit beta type-9                                    | Q5JNW4 | PSMB9   | 523 | 644 | 8,7  | 8,2  | 2  | 1  |      |      |        |        |      |      |        |        | 3,62 |      | 0,0055 |        |
| Protein CDV3 homolog                                              | Q9UKY7 | CDV3    | 527 | 432 | 14   | 10,9 | 2  | 1  | 1,33 | 1,50 | 0,0321 | 0,2964 | 2,04 |      | 0,0138 |        | 4,46 |      | 0,0005 |        |
| Protein disulfide-isomerase A3 precursor                          | P30101 | PDIA3   | 57  | 56  | 36,8 | 34,5 | 16 | 10 |      | 1,48 |        | 0,0147 | 1,50 |      | 0      |        | 2,12 | 2,82 | 0      | 0,0002 |
| Protein disulfide-isomerase precursor                             | P07237 | P4HB    | 48  | 58  | 47,6 | 41,7 | 14 | 7  | 1,17 | 1,41 | 0,0378 | 0,0058 | 1,43 |      | 0      |        | 1,97 | 2,71 | 0      | 0      |
| Protein DJ-1                                                      | Q99497 | PARK7   | 190 | 135 | 57,1 | 48,2 | 6  | 5  | 1,33 | 1,54 | 0,0001 | 0,0143 | 1,87 |      | 0,006  |        | 3,35 | 3,31 | 0,0001 | 0      |
| Protein FAM49B                                                    | Q9NUQ9 |         | 341 | 344 | 36,7 | 20,7 | 2  | 2  |      |      |        |        | 1,43 | 1,23 | 0,1848 | 0,5872 | 2,52 |      | 0,0232 |        |
| Protein S100-A11                                                  | P31949 | S100A11 | 427 | 246 | 31,4 | 37,1 | 3  | 3  |      | 2,07 |        | 0,0044 |      |      |        |        | 6,06 | 4,58 | 0,0571 | 0,0007 |
| Protein S100-A4                                                   | P26447 | S100A4  | 226 | 162 | 42,6 | 36,6 | 8  | 6  | 1,53 | 1,74 | 0,0253 | 0,0003 | 2,20 |      | 0,0282 |        | 4,63 | 3,68 | 0,0032 | 0,0021 |
| Protein S100-A6                                                   | P06703 | S100A6  | 454 | 388 | 30   | 30   | 2  | 2  | 1,65 | 1,97 | 0,0162 | 0,0066 | 2,80 |      | 0,0217 |        | 5,63 | 4,02 | 0,0074 | 0,0015 |
| Protein S100-A8                                                   | P05109 | S100A8  | 236 | 136 | 57   | 65,6 | 6  | 6  | 1,28 | 1,67 | 0,001  | 0,0002 | 1,91 |      | 0,0002 |        | 2,78 | 2,81 | 0      | 0      |
| Protein S100-A9                                                   | P06702 | S100A9  | 199 | 168 | 51,8 | 68,4 | 9  | 9  | 1,24 | 1,78 | 0,0035 | 0,0012 | 1,70 |      | 0,0006 |        | 2,72 | 2,69 | 0,0001 | 0,0002 |
| Protein transport protein Sec31A                                  | O94979 | SEC31A  | 588 |     | 5,1  |      | 2  |    |      |      |        |        | 1,89 |      | 0,0089 |        | 3,83 |      | 0,0423 |        |

|                                                         |        |          |         |           |       |           |          |           |               |               |               |               |  |  |  |  |  |  |
|---------------------------------------------------------|--------|----------|---------|-----------|-------|-----------|----------|-----------|---------------|---------------|---------------|---------------|--|--|--|--|--|--|
| Protein-L-isoaspartate(D-aspartate) O-methyltransferase | P22061 | PCMT1    | 509     | 29,1      | 2     | 1,74      | 0,0093   | 2,47      | 0,0113        | 5,09          | 0,0036        |               |  |  |  |  |  |  |
| PSMB4 protein                                           | Q6IBI4 | PSMB4    | 412 338 | 22,4 24,2 | 3 2   |           |          | 2,16      | 0,0108        |               |               |               |  |  |  |  |  |  |
| Puromycin-sensitive aminopeptidase                      | P55786 | NPEPPS   | 383 213 | 19,8 15   | 2 3   | 1,95      | 0,005    | 2,06      | 0,013         | 3,73 3,77     | 0,0051 0      |               |  |  |  |  |  |  |
| Putative uncharacterized protein                        | Q9HBP0 | INHBA    | 854 258 | 19,3 17,4 | 0 2   | 2,37      | 0,0072   | 1,50      | 0,004         | 2,45 3,22     | 0,002 0,0034  |               |  |  |  |  |  |  |
| Putative uncharacterized protein                        | Q86Z22 | SH3BGRL3 | 217 202 | 40,7 28,3 | 8 5   | 1,53 1,74 | 0,0408   | 0,0129    | 2,44          | 0,0322        | 4,44 3,68     | 0,0013 0,0066 |  |  |  |  |  |  |
| Putative uncharacterized protein (Fragment)             | Q9BRB1 |          |         | 96 26,6   | 6     |           |          |           |               |               | 3,74          | 0,0002        |  |  |  |  |  |  |
| Putative uncharacterized protein ARPC2                  | Q53R19 | ARPC2    | 100 130 | 35,7 33,3 | 9 4   | 1,35 1,64 | 0,0007   | 0,0001    | 1,78          | 0             | 3,17 2,94     | 0 0           |  |  |  |  |  |  |
| Putative uncharacterized protein ATIC                   | Q53S28 | ATIC     | 310     | 17,1      | 4     | 1,33      | 0,1596   | 2,62      | 0,0205        | 4,60          | 0,0152        |               |  |  |  |  |  |  |
| Putative uncharacterized protein DKFZp434B0535          | Q9HOC7 | ATP6AP1  | 231 311 | 20,6 18,9 | 6 2   |           |          | 0,78      | 0,0182        | 1,21 1,11     | 0,339         |               |  |  |  |  |  |  |
| Putative uncharacterized protein DKFZp686I04222         | Q7Z2Y7 | SERPINB6 | 413     | 19,3      | 2     |           |          | 1,78      | 0,0462        | 2,94          | 0,0201        |               |  |  |  |  |  |  |
| Putative uncharacterized protein DKFZp686I0746          | Q6MZZ3 | DCTN1    | 747 402 | 16,8 15,8 | 1 2   |           |          |           |               | 6,38 6,35     |               |               |  |  |  |  |  |  |
| Putative uncharacterized protein DKFZp686M09245         | Q6MZV5 | ARCNI    | 308 293 | 20,3 10,9 | 3 3   | 1,46      | 0,0063   | 1,97      | 0,0015        | 3,58 4,14     | 0,0012 0,0011 |               |  |  |  |  |  |  |
| Putative uncharacterized protein DKFZp686M0959          | Q7Z3V0 | IDH1     | 63 73   | 51 46,6   | 12 7  | 1,33 1,69 | 0,0039   | 0,0008    | 2,19          | 0             | 3,81 3,66     | 0 0           |  |  |  |  |  |  |
| Putative uncharacterized protein DKFZp761E1322          | Q69YG1 | MTPN     | 437 268 | 37,3 33,1 | 2 3   | 1,75 1,76 | 0,1824   |           |               | 4,90          | 0,0811        |               |  |  |  |  |  |  |
| Putative uncharacterized protein DKFZp781C13106         | Q6AI32 | HEXA     | 213 274 | 23,6 21,2 | 4 3   | 1,42      | 0,045    | 0,70      | 0,0057        |               |               |               |  |  |  |  |  |  |
| Putative uncharacterized protein ERP70                  | Q549T6 | PDIA4    | 132 208 | 40,9 16,3 | 10 4  | 1,31 1,18 | 0,0263   | 0,0443    | 1,71 0,65     | 0,0017 0,1304 | 2,41 2,20     | 0 0,0057      |  |  |  |  |  |  |
| Putative uncharacterized protein IL1RN                  | Q53SC2 | IL1RN    | 319 221 | 36,1 36,1 | 6 4   |           |          | 0,87 0,34 | 0,4803 0,0489 | 1,35 1,44     | 0,2338 0,5464 |               |  |  |  |  |  |  |
| Putative uncharacterized protein P5                     | Q53RC7 | PDIA6    | 353 348 | 25 17,1   | 3 2   | 1,49      | 0,0206   | 1,49 1,59 | 0,2725        | 2,30 3,98     | 0,0321 0,042  |               |  |  |  |  |  |  |
| Putative uncharacterized protein SPP1                   | Q4W597 | SPP1     | 87 63   | 51,3 39,8 | 16 10 | 1,32      | 0,0213   | 0,45 0,23 | 0 0,0045      | 0,67 0,48     | 0,0072 0,1245 |               |  |  |  |  |  |  |
| Putative uncharacterized protein tmp_locus_46           | Q53TR4 | QPCT     | 356 284 | 18 16,1   | 3 3   | 1,32      | 0,0063   |           |               | 0,97 1,10     | 0,8836 0,791  |               |  |  |  |  |  |  |
| Pyridoxal kinase                                        | O00764 | PDXK     | 225 231 | 28,9 29,2 | 6 3   | 1,55 1,58 | 0,0156   | 0,1411    | 2,63          | 0,003         | 4,29 3,64     | 0,0034 0,0091 |  |  |  |  |  |  |
| Pyruvate kinase                                         | A6NFK3 | PKM2     | 866     | 61,2      | 24    | 1,34      | 0,2477   |           |               |               |               |               |  |  |  |  |  |  |
| Pyruvate kinase isozymes M1/M2                          | P14618 | PKM2     | 18 23   | 62,3 46,3 | 24 15 | 1,49 1,34 | 0,0647   |           |               | 2,60          | 0,002         |               |  |  |  |  |  |  |
| RAB11B protein                                          | Q6FI42 | RAB11B   | 408     | 25,7      | 2     | 1,46      | 0,0154   | 2,10      | 0,0002        | 3,88          | 0,0004        |               |  |  |  |  |  |  |
| RAB1A, member RAS oncogene family                       | Q5U0I6 | RAB1A    | 246     | 33,7      | 4     | 1,63      | 0,0223   | 2,48      | 0,0095        | 4,84          | 0,0055        |               |  |  |  |  |  |  |
| Ras GTPase-activating-like protein IQGAP1               | P46940 | IQGAP1   | 50 67   | 26,3 15,6 | 12 8  | 1,27 1,80 | 0,0042   | 0,0103    | 2,12          | 0             | 3,98 4,34     | 0 0,0001      |  |  |  |  |  |  |
| Ras-related C3 botulinum toxin substrate 2 precursor    | P15153 | RAC2     | 349 281 | 32,3 18,2 | 3 4   | 1,95      | 0,0121   | 2,05      | 0,0105        | 3,43 4,40     | 0,0064 0,0242 |               |  |  |  |  |  |  |
| Ras-related protein Rab-1B                              | Q9H0U4 | RAB1B    | 662     | 19,9      | 2     |           |          |           |               | 4,52          | 0,0505        |               |  |  |  |  |  |  |
| Ras-related protein Rab-8B                              | Q92930 | RAB8B    | 925     | 28,5      | 2     | 1,97      | 0,0224   | 1,76      | 0,0124        | 3,64          | 0,0151        |               |  |  |  |  |  |  |
| Renin receptor precursor                                | O75787 | ATP6AP2  | 293 296 | 21,1 12,3 | 4 2   | 1,48      | 0,0098   | 0,64 0,38 | 0,0121 0,0031 | 1,02 1,21     | 0,8354 0,0494 |               |  |  |  |  |  |  |
| Reticulon-4                                             | Q9NQC3 | RTN4     | 499     | 8,2       | 2     |           |          |           |               | 2,72          | 0,0477        |               |  |  |  |  |  |  |
| Retinal dehydrogenase 2                                 | O94788 | ALDH1A2  | 275 251 | 23,9 17,2 | 4 3   | 1,60 1,70 | 0 0,0075 | 2,19      | 0             | 4,55 3,05     | 0 0,0128      |               |  |  |  |  |  |  |
| Retinoic acid receptor responder protein 1              | P49788 | RARRES1  | 484 681 | 22,8 11,2 | 3 1   | 0,69      | 0,0079   | 0,38 0,44 | 0,0059        | 0,47 0,65     | 0,0101        |               |  |  |  |  |  |  |

|                                                                                   |        |          |     |     |      |      |    |    |      |      |        |        |      |        |        |        |        |        |        |        |
|-----------------------------------------------------------------------------------|--------|----------|-----|-----|------|------|----|----|------|------|--------|--------|------|--------|--------|--------|--------|--------|--------|--------|
| Rho GDP-dissociation inhibitor 2                                                  | P52566 | ARHGDI   | 174 | 140 | 69,7 | 52,7 | 8  | 5  | 1,39 | 1,71 | 0,0003 | 0,001  | 2,03 | 0      | 3,64   | 3,64   | 0      | 0      |        |        |
| Ribonuclease K6 precursor                                                         | Q93091 | RNASE6   | 369 | 373 | 22,7 | 15,3 | 3  | 2  | 0,98 | 1,15 | 0,8231 |        | 0,70 | 0,0397 | 0,96   | 0,76   | 0,5295 |        |        |        |
| Ribosomal protein L12 variant (Fragment)                                          | Q59FI9 | RPL12    |     | 323 |      | 18,8 |    | 2  |      | 1,93 |        | 0,0014 |      |        |        | 3,29   |        | 0,0024 |        |        |
| Ribosomal protein S19 (Fragment)                                                  | Q8WVX7 | RPS19    | 476 |     | 38,2 |      | 2  |    |      |      |        |        |      |        | 4,77   |        | 0,0094 |        |        |        |
| Ribosomal protein S3 variant (Fragment)                                           | Q53G83 | RPS3     | 391 | 337 | 40,3 | 25,9 | 2  | 2  |      |      |        |        | 2,29 | 0,0147 | 4,69   |        | 0,0076 |        |        |        |
| RNH1 protein (Fragment)                                                           | Q96FD7 | RNH1     | 122 | 104 | 34,5 | 28,9 | 8  | 6  | 1,48 | 1,77 | 0,0043 | 0,0034 | 2,04 | 0,004  | 3,85   | 4,18   | 0,0001 | 0      |        |        |
| RPLP2 protein                                                                     | Q6FG96 | RPLP2    | 314 | 287 | 43,5 | 34,8 | 3  | 3  |      |      |        |        |      |        | 3,33   |        | 0,006  |        |        |        |
| RSU1 protein                                                                      | Q6FI17 | RSU1     | 248 | 512 | 31,8 | 12,6 | 4  | 2  |      |      |        |        | 1,82 | 0,0093 | 3,23   |        | 0,001  |        |        |        |
| S-adenosylmethionine synthetase isoform type-2                                    | P31153 | MAT2A    | 299 | 330 | 18,2 | 14,7 | 3  | 2  | 1,58 |      | 0,005  |        | 2,26 | 0,0001 | 4,29   |        | 0,0001 |        |        |        |
| SDC4 protein                                                                      | Q6FGN3 | SDC4     | 301 | 372 | 27,3 | 17,2 | 4  | 2  | 0,70 | 0,84 | 0,1738 |        | 0,72 | 0,85   | 0,1751 |        |        |        |        |        |
| Semaphorin-7A precursor                                                           | O75326 | SEMA7A   | 143 | 199 | 29,7 | 14,6 | 9  | 4  |      | 1,68 |        | 0,0021 |      |        |        | 2,42   |        | 0,0002 |        |        |
| Septin-9                                                                          | Q9UHD8 | SEPT9    | 366 |     | 20,8 |      | 3  |    |      |      |        |        |      |        | 6,29   |        | 0,0141 |        |        |        |
| Serglycin precursor                                                               | P10124 | SRGN     | 338 | 320 | 41,8 | 27,9 | 7  | 3  |      | 1,67 |        | 0,0286 | 0,51 | 0,17   | 0,0042 | 0,0064 |        |        |        |        |
| Serine/threonine-protein kinase PAK 2                                             | Q13177 | PAK2     | 493 |     | 10,3 |      | 2  |    |      |      |        |        | 2,05 | 0,0127 | 3,50   |        | 0,0243 |        |        |        |
| Serine/threonine-protein phosphatase 2A 65 kDa regulatory subunit A alpha isoform | P30153 | PPP2R1A  | 175 | 387 | 31,9 | 13,1 | 6  | 2  | 1,82 | 2,29 | 0,0041 | 0,0014 | 2,88 | 0,0017 | 5,64   | 5,10   | 0,0013 | 0,0062 |        |        |
| Serpin B9                                                                         | P50453 | SERPINB9 | 406 |     | 21,5 |      | 2  |    | 1,20 |      | 0,0092 |        |      |        | 2,59   |        | 0,0043 |        |        |        |
| Serum albumin precursor                                                           | P02768 | ALB      | 10  | 4   | 67,5 | 62,4 | 50 | 59 | 1,29 | 1,62 | 0      | 0      | 1,37 | 0,77   | 0      | 0,0242 | 1,47   | 2,17   | 0      | 0      |
| SET translocation                                                                 | Q5VXV3 | SET      | 440 | 368 | 20,7 | 20   | 2  | 2  | 1,47 |      | 0,0458 |        | 2,55 | 0,0023 | 5,06   | 6,13   | 0,0107 | 0,0222 |        |        |
| SH3 domain-binding glutamic acid-rich-like protein                                | O75368 | SH3BGR   | 247 | 351 | 56,1 | 32,5 | 6  | 2  | 1,36 | 1,65 | 0,0201 | 0,0154 | 1,77 | 0,0242 | 3,17   | 3,42   | 0,0039 | 0,0058 |        |        |
| SH3 domain-binding protein 1                                                      | Q9Y3L3 | SH3BP1   | 481 |     | 10,4 |      | 2  |    | 1,70 |      | 0,0013 |        |      |        | 4,50   |        | 0,0272 |        |        |        |
| Sialic acid-binding Ig-like lectin 14 precursor                                   | Q08ET2 | SIGLEC14 | 329 |     | 21,5 |      | 3  |    | 1,71 |      | 0,0013 |        |      |        | 2,13   |        | 0,0122 |        |        |        |
| Sialoadhesin precursor                                                            | Q9BZZ2 | SIGLEC1  | 352 |     | 5,3  |      | 3  |    | 2,45 |      | 0,0138 |        | 3,86 | 0,0013 | 5,28   |        | 0,0027 |        |        |        |
| Signal-regulatory protein alpha                                                   | A2A2E1 | SIRPA    | 102 | 112 | 25,2 | 28   | 9  | 6  |      |      |        |        | 1,42 | 0,0001 | 2,18   |        | 0      |        |        |        |
| Similar to protein kinase C substrate                                             | Q96RZ2 | GNPTG    | 455 |     | 22,1 |      | 2  |    |      |      |        |        |      |        | 1,22   |        | 0,016  |        |        |        |
| SLAM family member 5 precursor                                                    | Q9UIB8 | CD84     | 397 | 324 | 24,6 | 8,4  | 2  | 2  | 0,89 | 1,05 | 0,2848 | 0,7932 | 1,02 | 0,90   | 0,816  | 0,69   |        |        |        |        |
| Small nuclear ribonucleoprotein Sm D3                                             | P62318 | SNRPD3   | 502 |     | 42,1 |      | 2  |    |      |      |        |        | 1,70 | 0,0351 | 2,89   |        | 0,0212 |        |        |        |
| Sodium/potassium-transporting ATPase subunit alpha-1 precursor                    | P05023 | ATP1A1   | 206 | 117 | 20,8 | 12,3 | 5  | 6  | 1,46 | 2,09 | 0,037  | 0,002  | 1,76 | 0,0103 | 2,93   | 3,43   | 0,0007 | 0,0004 |        |        |
| Sortilin precursor                                                                | Q99523 | SORT1    | 153 | 116 | 18,4 | 18,5 | 7  | 5  |      | 1,12 |        | 0,4903 | 2,13 | 3,24   | 0      | 0,0014 | 2,09   | 4,35   | 0,0011 | 0,0001 |
| SPARC protein                                                                     | Q6IBK4 | SPARC    | 72  | 66  | 38,6 | 34   | 14 | 13 |      | 1,14 |        | 0,0419 | 0,47 | 0,22   | 0      | 0,0007 | 0,61   | 0,51   | 0,0039 | 0,0002 |
| Spondin-2 precursor                                                               | Q9BUD6 | SPON2    | 238 | 189 | 21,5 | 12,4 | 5  | 3  | 1,07 | 1,21 | 0,0305 | 0,1468 | 0,52 | 0,33   | 0,0019 | 0,1017 | 0,83   | 0,80   | 0,2593 | 0,2232 |
| Staphylococcal nuclease domain-containing protein 1                               | Q7KZF4 | SND1     | 477 | 427 | 17,7 | 7,9  | 2  | 1  | 1,45 | 1,88 | 0,0094 | 0,044  | 2,17 | 0,009  | 4,41   | 4,03   | 0,0003 | 0,0294 |        |        |

|                                                      |        |        |     |     |      |      |    |    |      |      |        |        |      |      |        |        |      |      |        |        |
|------------------------------------------------------|--------|--------|-----|-----|------|------|----|----|------|------|--------|--------|------|------|--------|--------|------|------|--------|--------|
| STAT1                                                | Q68D00 | STAT1  | 270 | 306 | 22,5 | 12,5 | 3  | 2  | 1,87 |      | 0,0052 |        | 2,54 |      | 0,0025 |        | 6,47 |      | 0,0013 |        |
| Stress-induced-phosphoprotein 1                      | Q5TZU9 | STIP1  | 81  | 79  | 34,3 | 28   | 8  | 6  | 1,54 | 1,77 | 0      | 0      | 2,19 |      | 0      |        | 5,24 | 4,61 | 0      | 0      |
| Sulfhydryl oxidase 1 precursor                       | O00391 | QSOX1  | 36  | 41  | 34,4 | 28,7 | 17 | 11 |      | 1,40 |        | 0,0015 | 0,52 | 0,54 | 0      | 0,0038 | 0,69 |      | 0,0047 |        |
| Superoxide dismutase [Cu-Zn]                         | Q6NR85 | SOD1   | 573 | 441 | 29,2 | 42,9 | 2  | 2  | 1,29 | 1,57 | 0,0217 | 0,0247 |      |      |        |        | 2,74 | 2,71 | 0,0221 | 0,0124 |
| Superoxide dismutase [Mn], mitochondrial precursor   | P04179 | SOD2   | 322 | 665 | 31,5 | 12,7 | 3  | 1  |      |      |        |        | 1,47 |      | 0,046  |        | 2,03 | 4,56 | 0,0064 | 0,0326 |
| Synaptic vesicle membrane protein VAT-1 homolog      | Q99536 | VAT1   | 324 | 474 | 19,6 | 16,3 | 3  | 1  | 1,90 |      | 0,0233 |        | 2,66 |      | 0,0139 |        | 5,53 | 5,49 | 0,003  |        |
| Syntaxin-binding protein 2 (STXBP2)                  | Q15833 | STXBP2 | 330 | 534 | 25,1 | 14,6 | 4  | 1  |      |      |        |        |      |      |        |        | 3,81 |      | 0,0206 |        |
| TAGLN2 protein                                       | Q6FGI1 | TAGLN2 | 145 | 120 | 48,7 | 52,3 | 9  | 6  | 1,61 | 2,07 | 0,0001 | 0,0072 | 2,25 |      | 0      |        | 4,85 | 5,72 | 0      | 0,0002 |
| Talin-1                                              | Q9Y490 | TLN1   | 6   | 13  | 35,7 | 23,1 | 43 | 24 | 1,34 | 1,52 | 0      | 0,0005 | 1,62 |      | 0      |        | 2,74 | 3,32 | 0      | 0      |
| Tartrate-resistant acid phosphatase type 5 precursor | P13686 | ACP5   | 374 | 256 | 25,9 | 22,5 | 3  | 2  | 1,08 | 1,04 | 0,1396 | 0,7601 |      |      |        |        | 1,13 | 1,15 | 0,1842 | 0,4356 |
| TBCA protein                                         | Q6FGD7 | TBCA   | 416 | 298 | 38   | 47,2 | 2  | 2  | 1,52 | 1,99 | 0,0023 | 0,0475 | 2,46 |      | 0,0095 |        | 5,91 | 4,83 | 0,0029 | 0,0028 |
| T-complex protein 1 subunit alpha                    | P17987 | TCP1   | 465 | 400 | 16,2 | 10,1 | 2  | 1  |      | 1,80 |        | 0,0521 | 2,17 |      | 0,0152 |        | 3,76 | 4,37 | 0,0038 | 0,0237 |
| T-complex protein 1 subunit beta                     | P78371 | CCT2   | 177 | 255 | 23,9 | 14,4 | 6  | 3  | 1,43 |      | 0,0368 |        | 2,24 |      | 0,0005 |        | 4,47 | 3,20 | 0      | 0,0051 |
| T-complex protein 1 subunit delta                    | P50991 | CCT4   | 400 | 433 | 24,3 | 17,4 | 2  | 1  | 1,45 |      | 0,2253 |        | 2,61 |      | 0,0108 |        | 4,98 |      | 0,0106 |        |
| T-complex protein 1 subunit eta                      | Q99832 | CCT7   | 309 | 159 | 37,9 | 23,8 | 3  | 4  | 1,67 | 2,50 | 0,0071 | 0,0431 | 2,42 |      | 0,0004 |        | 4,75 |      | 0,0001 |        |
| T-complex protein 1 subunit zeta                     | P40227 | CCT6A  | 424 | 329 | 16,2 | 21   | 2  | 1  | 1,60 | 1,67 | 0,0025 | 0,0249 | 2,48 |      | 0,0019 |        | 5,02 | 3,58 | 0,0002 | 0,0007 |
| Tenascin C                                           | Q5T7S3 | TNC    | 129 | 383 | 12   | 5,1  | 7  | 2  | 0,89 | 1,05 | 0,0766 | 0,4822 | 0,84 |      | 0,0404 |        |      |      |        |        |
| Thioredoxin                                          | Q53X69 | TXN    | 334 | 214 | 48,6 | 44,8 | 4  | 4  | 1,47 | 1,90 | 0,0005 | 0,0041 | 2,69 |      | 0,0221 |        | 4,68 | 4,77 | 0,0076 | 0,0154 |
| Thioredoxin domain-containing protein 4 precursor    | Q9BS26 | ERP44  | 169 | 359 | 33   | 15,3 | 5  | 1  |      |      |        |        | 2,04 |      | 0,001  |        | 3,41 |      | 0,0001 |        |
| Thioredoxin reductase 1, cytoplasmic                 | Q16881 | TXNRD1 | 147 | 113 | 23,4 | 17   | 9  | 7  | 1,30 | 1,37 | 0,0325 | 0,0263 | 2,16 |      | 0,0002 |        | 3,44 | 2,76 | 0      | 0,0075 |
| Threonyl-tRNA synthetase variant (Fragment)          | Q53GX7 | TARS   | 531 | 613 | 11,6 | 15,1 | 2  | 1  | 1,55 |      | 0,0391 |        | 2,16 |      | 0,0374 |        | 3,33 |      | 0,0166 |        |
| Thrombospondin 1 variant (Fragment)                  | Q59E99 | THBS1  | 37  | 185 | 26,2 | 13,7 | 15 | 4  | 1,04 | 1,23 | 0,4028 |        |      |      |        |        | 1,30 |      | 0,0155 |        |
| Thymidine phosphorylase precursor                    | P19971 | TYMP   | 105 | 89  | 39,8 | 33,4 | 10 | 8  | 1,41 | 2,33 | 0,0182 | 0,0004 | 1,88 |      | 0,0052 |        | 3,55 | 5,83 | 0      | 0,0001 |
| TIMP1 protein                                        | Q6FGX5 | TIMP1  | 470 | 395 | 17,4 | 13   | 2  | 2  |      | 1,19 |        | 0,0143 |      | 0,38 |        | 0,0291 | 0,96 | 0,77 | 0,6057 | 0,3963 |
| TMSB4X protein (Fragment)                            | Q0P5Q0 | TMSB4X | 254 | 460 | 47,1 | 43,5 | 4  | 2  |      |      |        |        | 2,77 |      | 0,0769 |        | 5,40 |      | 0,0474 |        |
| Transaldolase                                        | P37837 | TALDO1 | 47  | 32  | 53,7 | 51,3 | 15 | 12 | 1,39 | 1,64 | 0      | 0      | 2,10 |      | 0      |        | 3,61 | 3,59 | 0      | 0      |
| Transcription elongation factor B polypeptide 2      | Q15370 | TCEB2  | 462 |     | 20,3 |      | 2  |    | 1,82 |      | 0,0373 |        | 2,60 |      | 0,0098 |        | 5,41 |      | 0,0041 |        |
| Transferrin receptor                                 | Q1HE24 | TFRC   | 13  | 12  | 53,8 | 51,5 | 41 | 38 | 0,83 |      | 0,0018 |        | 2,65 |      | 0      |        | 2,37 |      | 0      |        |
| Transferrin variant (Fragment)                       | Q53H26 | TF     | 9   | 8   | 63   | 60,2 | 51 | 44 |      | 1,26 |        | 0      | 1,31 |      | 0      |        | 1,33 | 1,72 | 0      | 0      |
| Transforming growth factor, beta-induced, 68kDa      | Q53XM1 | TGFBI  | 45  | 33  | 38,5 | 30,2 | 22 | 16 | 1,30 | 1,47 | 0,0001 | 0,0005 |      | 0,66 |        | 0,0018 | 1,47 | 1,86 | 0      | 0      |
| Transketolase variant (Fragment)                     | Q53EM5 | TKT    | 54  | 28  | 34   | 36,9 | 13 | 13 | 1,35 | 1,66 | 0,0002 | 0      | 2,08 |      | 0      |        | 3,42 | 3,69 | 0      | 0      |
| Transmembrane glycoprotein NMB precursor             | Q14956 | GPNMB  | 447 | 313 | 10,5 | 8,2  | 3  | 2  | 0,79 | 0,85 | 0,1199 | 0,0141 | 0,68 | 0,51 | 0,2247 | 0,276  |      |      |        |        |
| Triosephosphate isomerase (Fragment)                 | Q6FHP9 | TPI1   | 61  | 78  | 75,5 | 49   | 16 | 10 | 1,43 | 1,76 | 0      | 0,0017 | 2,16 |      | 0      |        | 3,38 | 3,73 | 0      | 0      |

|                                                               |        |          |     |     |      |      |    |    |      |      |        |        |      |        |      |        |        |        |
|---------------------------------------------------------------|--------|----------|-----|-----|------|------|----|----|------|------|--------|--------|------|--------|------|--------|--------|--------|
| Tripeptidyl peptidase II                                      | Q5VZU9 | TPP2     | 296 | 710 | 10,5 | 10,1 | 2  | 0  | 1,41 | 1,45 | 0,081  |        | 1,91 | 0,0049 | 2,83 | 0,0044 |        |        |
| Tropomyosin 1 alpha variant 6                                 | Q1ZYL5 | TPM1     | 360 | 467 | 44,9 | 44   | 7  | 4  | 1,29 | 1,39 | 0,3464 |        |      |        | 2,18 | 2,05   | 0,0883 |        |
| Tropomyosin 3                                                 | Q5VU59 | TPM3     | 113 | 47  | 69,4 | 72,4 | 14 | 10 | 1,32 | 1,82 | 0,0107 | 0,0116 | 1,67 | 0,0057 | 3,43 | 3,31   | 0,0002 | 0,0008 |
| Tropomyosin 4                                                 | Q5U0D9 | TPM4     | 49  | 122 | 67,7 | 59,3 | 15 | 9  | 1,36 | 1,72 | 0,0003 | 0,0021 | 1,73 | 0      | 3,37 | 3,06   | 0      | 0      |
| Trypsin-I precursor                                           | P07477 | PRSS1    | 370 | 282 | 15,4 | 17   | 6  | 5  | 1,12 | 1,36 |        |        | 1,37 | 0,77   | 1,63 | 1,65   |        |        |
| Tryptophanyl-tRNA synthetase, cytoplasmic                     | Q53XB6 | WARS     | 168 | 222 | 31   | 27,4 | 8  | 3  | 1,45 | 1,98 | 0,0046 | 0,0281 | 1,82 | 0,0036 | 3,62 | 4,51   | 0,0002 | 0,0025 |
| Tubulin alpha-1A chain                                        | Q71U36 | TUBA1A   |     | 75  |      | 37,3 |    | 7  |      | 1,79 |        | 0,008  |      |        |      | 4,96   |        | 0,0007 |
| Tubulin alpha-1C chain                                        | Q9BQE3 | TUBA1C   | 78  |     | 39,2 |      | 12 |    | 1,46 |      | 0,0057 |        | 2,48 | 0,0044 | 4,90 |        | 0,0029 |        |
| Tubulin alpha-4A chain                                        | P68366 | TUBA4A   | 596 |     | 29,9 |      | 8  |    |      |      |        |        |      |        | 3,56 |        | 0,0063 |        |
| Tubulin, beta                                                 | Q5SU16 | TUBB2A   | 511 | 71  | 36   | 32,9 | 10 | 10 |      |      |        |        |      |        | 4,90 |        | 0,0212 |        |
| Tumor necrosis factor receptor superfamily member 5 precursor | P25942 | CD40     | 521 | 487 | 7,9  | 12,3 | 2  | 1  |      |      |        |        | 1,19 | 0,0359 |      | 4,02   |        | 0,0395 |
| Tumor rejection antigen (Gp96) 1                              | Q5CAQ5 | HSP90B1  | 116 | 501 | 28,7 | 14,3 | 10 | 2  | 1,38 |      | 0,0009 |        | 1,61 | 0,0011 | 2,35 |        | 0      |        |
| Twinfilin-2                                                   | Q6IBS0 | TWF2     | 386 |     | 24,4 |      | 2  |    | 1,48 |      | 0,0192 |        | 1,96 | 0,0021 | 4,33 |        | 0,0001 |        |
| Tyrosine-protein kinase receptor                              | A6P4V4 |          | 446 |     | 15,3 |      | 2  |    | 1,75 |      | 0,0244 |        | 2,92 | 0,0276 | 5,30 |        | 0,061  |        |
| Ubiquitin A-52 residue ribosomal protein fusion product 1     | Q3MIH3 | UBA52    | 186 | 173 | 53,1 | 65,6 | 6  | 4  | 1,28 | 1,43 | 0,003  | 0,0001 | 1,60 | 0,0003 | 3,51 | 3,31   | 0      | 0      |
| Ubiquitin carboxyl-terminal hydrolase 5                       | P45974 | USP5     | 514 | 587 | 7,9  | 7    | 2  | 1  |      |      |        |        |      |        | 4,96 |        | 0,0341 |        |
| Ubiquitin-conjugating enzyme E2 L3                            | P68036 | UBE2L3   | 486 | 286 | 37   | 33,1 | 2  | 3  | 1,52 |      | 0,0042 |        | 2,04 | 0,0235 | 4,33 | 3,25   | 0,0124 | 0,047  |
| Ubiquitin-like modifier activating enzyme 1                   | Q5JRR8 | UBA1     | 109 | 88  | 18,1 | 14,5 | 8  | 7  | 1,58 | 1,75 | 0,0006 | 0,0122 | 2,26 | 0,0002 | 4,69 | 3,76   | 0      | 0      |
| Uncharacterized metallophosphoesterase CSTP1                  | Q9BRF8 | CPPED1   | 401 | 397 | 24,8 | 12,7 | 2  | 2  |      | 1,85 |        | 0,0248 | 2,16 | 0,0177 | 3,86 | 4,75   | 0,003  | 0,0026 |
| Uncharacterized protein C12orf5                               | Q9NQ88 | C12orf5  | 441 |     | 21,9 |      | 2  |    |      |      |        |        | 1,93 | 0,009  | 3,96 |        | 0,0005 |        |
| Uncharacterized protein C9orf19 (Fragment)                    | A8MZ81 |          | 456 |     | 37,3 |      | 2  |    |      |      |        |        |      |        | 2,43 |        | 0,0013 |        |
| Uncharacterized protein ENSP00000348237                       | A6NJ80 |          | 196 |     | 40,2 |      | 7  |    | 1,34 |      | 0,0115 |        | 1,74 | 0,0007 | 2,83 |        | 0,0002 |        |
| Uncharacterized protein ENSP00000381447 (Fragment)            | A8MY04 |          | 452 |     | 28,2 |      | 2  |    |      |      |        |        |      |        | 3,84 |        | 0,0285 |        |
| Uncharacterized protein FAM129A (Fragment)                    | A8MYQ4 |          | 315 |     | 18,3 |      | 3  |    | 1,52 |      | 0,0189 |        | 2,07 | 0,0016 | 3,72 |        | 0,0004 |        |
| Uncharacterized protein HPRT1                                 | A8MSU4 | HPRT1    | 399 |     | 21,6 |      | 2  |    |      |      |        |        |      |        | 2,82 |        | 0,0238 |        |
| Uncharacterized protein PEPD (Fragment)                       | A8MX47 | PEPD     |     | 204 |      | 17,9 |    | 3  |      | 1,46 |        | 0,0165 |      |        |      | 2,71   |        | 0      |
| Uncharacterized protein PRKACB (Fragment)                     | A6NJF4 | PRKACB   |     | 390 |      | 15,3 |    | 2  |      |      |        |        |      |        |      | 6,40   |        | 0,0058 |
| UPF0556 protein C19orf10 precursor                            | Q969H8 | C19orf10 | 339 | 530 | 26,6 | 15,6 | 3  | 1  |      |      |        |        | 2,38 | 0,004  | 3,58 |        | 0,0009 |        |
| UTP--glucose-1-phosphate uridylyltransferase                  | Q16851 | UGP2     | 377 | 468 | 22,6 | 13,4 | 2  | 1  | 1,52 | 1,85 | 0,0157 | 0,0009 | 2,26 | 0,0073 | 4,28 | 4,49   | 0,0035 | 0,0009 |
| UV excision repair protein RAD23 homolog B variant (Fragment) | Q53F10 | RAD23B   | 393 | 288 | 14,9 | 11,3 | 2  | 1  | 1,30 | 1,70 | 0,0104 | 0,0306 | 1,79 | 0,0039 | 3,90 | 4,15   | 0,0008 | 0,0018 |
| Vacuolar ATP synthase catalytic subunit A                     | P38606 | ATP6V1A  | 161 | 97  | 27,1 | 28,9 | 7  | 7  | 1,63 | 1,56 | 0,0003 | 0,0857 | 2,34 | 0,0001 | 3,65 | 2,89   | 0      | 0,0049 |



|                                                         |        |          |     |     |      |      |    |    |      |      |        |        |      |        |        |      |        |        |        |
|---------------------------------------------------------|--------|----------|-----|-----|------|------|----|----|------|------|--------|--------|------|--------|--------|------|--------|--------|--------|
| Vacuolar ATP synthase subunit B, brain isoform          | P21281 | ATP6V1B2 | 201 | 157 | 26,4 | 16,8 | 5  | 5  | 1,39 | 1,95 | 0,0744 | 0,003  | 1,88 | 0,0134 | 3,49   | 4,40 | 0,0002 | 0,0002 |        |
| Vacuolar protein sorting-associated protein 29          | Q9UBQ0 | VPS29    | 388 | 417 | 25,8 | 17,7 | 3  | 1  | 1,42 |      | 0,0138 |        | 2,00 | 0,007  | 3,51   | 4,36 | 0      | 0,0403 |        |
| Vacuolar protein sorting-associated protein 35          | Q96QK1 | VPS35    | 271 |     | 12,7 |      | 4  |    | 1,28 |      | 0,0009 |        | 1,67 | 0,0032 | 3,34   |      | 0      |        |        |
| Valosin-containing protein                              | Q2TAI5 | VCP      | 46  | 55  | 42,8 | 27,4 | 14 | 9  | 1,29 | 1,62 | 0,0293 | 0,0008 | 2,23 | 0      | 3,89   | 3,71 | 0      | 0      |        |
| Vascular endothelial growth factor receptor 1 precursor | P17948 | FLT1     | 185 | 447 | 17,3 | 12   | 5  | 1  | 1,36 | 2,00 | 0,0004 | 0,0209 | 1,04 | 1,05   | 0,6152 | 1,84 | 3,33   | 0      | 0,0279 |
| Vasodilator-stimulated phosphoprotein                   | P50552 | VASP     | 576 | 216 | 20,8 | 24,7 | 2  | 4  |      | 2,38 |        | 0,0453 | 1,19 | 0,0435 |        |      |        |        |        |
| WD repeat-containing protein 1                          | O75083 | WDR1     | 73  | 76  | 33,8 | 32,5 | 10 | 8  | 1,33 | 1,78 | 0,0002 | 0      | 2,07 | 0      | 2,98   | 3,42 | 0      | 0      |        |
| Vimentin                                                | P08670 | VIM      | 12  | 10  | 62,7 | 65,2 | 53 | 46 | 1,82 | 2,10 | 0      | 0      | 2,72 | 0      | 6,80   | 4,96 | 0      | 0      |        |
| Vinculin                                                | P18206 | VCL      | 11  | 24  | 50,1 | 30,1 | 33 | 13 | 1,22 | 1,66 | 0      | 0      | 1,54 | 0      | 2,27   | 3,03 | 0      | 0      |        |
| Zinc transporter ZIP10 precursor                        | Q9ULF5 | SLC39A10 | 378 | 648 | 9    | 2,2  | 2  | 1  |      |      |        |        | 0,70 | 0,57   | 0,0535 |      |        |        |        |
| Zyxin                                                   | Q15942 | ZYX      | 257 | 146 | 19,8 | 21,3 | 7  | 6  | 1,42 |      | 0,0183 |        | 1,99 | 0      | 4,09   | 3,64 | 0      | 0,0126 |        |

#### HSV-1 proteins

| Protein name                                     | SwissProt<br>Acc. No. | Genetrail<br>ID | N    |      | % Seq Cov |      | Pept(95%) |      | IFN- $\beta$ |         | HSV-1       |         | IFN- $\beta$ +HSV-1 |         |        |        |        |       |        |
|--------------------------------------------------|-----------------------|-----------------|------|------|-----------|------|-----------|------|--------------|---------|-------------|---------|---------------------|---------|--------|--------|--------|-------|--------|
|                                                  |                       |                 | Exp1 | Exp2 | Exp1      | Exp2 | Exp1      | Exp2 | Fold change  | P-value | Fold change | P-value | Fold change         | P-value |        |        |        |       |        |
|                                                  |                       |                 | Exp1 | Exp2 | Exp1      | Exp2 | Exp1      | Exp2 | Exp1         | Exp2    | Exp1        | Exp2    | Exp1                | Exp2    | Exp1   | Exp2   |        |       |        |
| Alkaline nuclease                                | P04294                |                 | 391  |      | 10,2      |      | 2         |      | 1,614        |         | 0,0342      |         |                     | 5,89    | 0,0402 |        |        |       |        |
| Deoxyuridine 5'-triphosphate nucleotidohydrolase | P10234                |                 | 279  | 368  | 24,9      | 29,1 | 4         | 3    |              |         |             | 5,162   | 0,0014              | 10,42   | 0,0001 |        |        |       |        |
| Envelope glycoprotein B                          | P08665                |                 | 27   |      | 36,7      |      | 21        |      | 1,567        |         | 0,0016      | 4,939   | 0                   | 8,306   | 0      |        |        |       |        |
| Envelope glycoprotein D                          | Q05059                |                 | 239  | 177  | 28        | 29,7 | 6         | 11   |              |         |             | 5,432   | 6,968               | 0,0037  | 0,003  | 4,501  | 10,42  | 0,003 | 0,0007 |
| Envelope glycoprotein E                          | P04488                |                 | 410  | 37   | 14,3      | 36   | 3         | 21   | 1,308        | 1,26    | 0,2776      | 0,1615  | 4,499               | 0,0085  | 6,711  | 0,002  |        |       |        |
| Envelope glycoprotein H                          | Q9DHD5                |                 | 324  |      | 17,7      |      | 3         |      | 1,664        |         | 0,0245      |         |                     | 6,478   | 0,0022 |        |        |       |        |
| Envelope glycoprotein I                          | P06487                |                 | 400  | 215  | 12,4      | 19,5 | 2         | 8    |              |         |             | 2,957   | 2,979               | 0,3247  | 0,1329 | 5,428  | 0,0372 |       |        |
| Tegument protein UL47                            | P08313                |                 | 408  |      | 26,6      |      | 2         |      |              |         |             | 4,014   |                     | 0,0176  | 6,401  | 0,0054 |        |       |        |
| Tegument protein VP16                            | P04486                |                 | 546  | 333  | 15,5      | 14,1 | 1         | 3    | 2,923        |         | 0,0326      |         | 13,33               | 0,0142  | 23,27  | 0,0161 |        |       |        |
| Tegument protein VP22                            | P10233                |                 | 417  | 520  | 44,3      | 30,9 | 2         | 3    |              |         |             |         |                     | 10,33   | 10,49  | 0,1557 | 0,2089 |       |        |
